# Supplementary material for: Quantification of O-(2-[18F]fluoroethyl)-L-tyrosine kinetics in glioma
Source: EJNMMI Res. 2018 Jul 31;8:72. doi: 10.1186/s13550-018-0418-0 (PMC6068050; doi:10.1186/s13550-018-0418-0)
Supplement: Supplementary file 2 — Patient information, TACs, AIFs. (XLSX 443 kb) [file 13550_2018_418_MOESM2_ESM.xlsx]

## Sheet: Patient information
Patient	Glioma	Grade	IDH1 status	1p19q codeletion	SUV conversion factor (patient body weight / Injected activity [18F]FET)
#					kg/MBq
P1	Glioblastoma	IV	wild type		0.541578
P2	Astrocytoma	II	mutant	no	0.397243
P3	Glioblastoma	IV	mutant		0.310559
P4	Oligodendrocytoma	II	mutant	yes	0.396204
P5	Astrocytoma	II	mutant	no	0.350648
P6	Glioblastoma	IV	wild type		0.439144
P7	Glioblastoma	IV	wild type		0.324838

## Sheet: TACs
Time			Activity concentration (Activity has been corrected for decay)
			P1	P1	P1	P1	P1	P1	P2	P2	P2	P2	P2	P2	P3	P3	P3	P3	P3	P3	P4	P4	P4	P4	P4	P4	P5	P5	P5	P5	P5	P5	P6	P6	P6	P6	P6	P6	P7	P7	P7	P7	P7	P7
Starttime of frame	Frame duration	Time midframe	Tumour low uptake region	Tumour medium uptake region	Tumour high uptake region	Reference region	Healthy region 1	Healthy region 2	Tumour low uptake region	Tumour medium uptake region	Tumour high uptake region	Reference region	Healthy region 1	Healthy region 2	Tumour low uptake region	Tumour medium uptake region	Tumour high uptake region	Reference region	Healthy region 1	Healthy region 2	Tumour low uptake region	Tumour medium uptake region	Tumour high uptake region	Reference region	Healthy region 1	Healthy region 2	Tumour low uptake region	Tumour medium uptake region	Tumour high uptake region	Reference region	Healthy region 1	Healthy region 2	Tumour low uptake region	Tumour medium uptake region	Tumour high uptake region	Reference region	Healthy region 1	Healthy region 2	Tumour low uptake region	Tumour medium uptake region	Tumour high uptake region	Reference region	Healthy region 1	Healthy region 2
minutes	minutes	minutes	kBq/mL	kBq/mL	kBq/mL	kBq/mL	kBq/mL	kBq/mL	kBq/mL	kBq/mL	kBq/mL	kBq/mL	kBq/mL	kBq/mL	kBq/mL	kBq/mL	kBq/mL	kBq/mL	kBq/mL	kBq/mL	kBq/mL	kBq/mL	kBq/mL	kBq/mL	kBq/mL	kBq/mL	kBq/mL	kBq/mL	kBq/mL	kBq/mL	kBq/mL	kBq/mL	kBq/mL	kBq/mL	kBq/mL	kBq/mL	kBq/mL	kBq/mL	kBq/mL	kBq/mL	kBq/mL	kBq/mL	kBq/mL	kBq/mL
0	0.25	0.125	0	0	0	0	0	0	0	0	0	0	0	0	0	0.0009173	0.0003143	0.0428374	0.0902777	0.087973	0	0	0	0	0	0	0	0	0	0	0	0	0	0	0	0	0	0	0	0.0041069	0.005034	0	0.0099023	0
0.25	0.0833333	0.291667	0	0	0	0	0	0	0	0	0	0	0	0	0.0037732	0.0256743	0.0452425	0.187206	0.092563	0.054567	0	0	0	0	0	0	0	0	0	0	0	0	0	0	0	0	0	0	0.0295962	0.0064534	0	0.23903	0.0994845	0
0.333333	0.0833333	0.375	0	0	0	0	0	0	0	0	0	0	0	0	3.34612	2.73314	2.46529	3.31683	5.5434	3.1689	0	0	0	0	0	0	0	0	0	0	0	0	0	0	0	0	0	0	2.41711	3.4858	5.03608	2.44968	5.85285	2.6879
0.416667	0.0833333	0.458333	0	0	0	0	0	0	0.164454	0.603862	0.751081	0.848891	1.47603	1.30685	12.5817	7.90384	5.98348	5.0545	7.70213	5.67477	0.796448	1.28937	1.90988	2.74091	0.525114	0.305818	1.11051	1.30526	1.86323	2.65744	0.705712	0.355313	0	0	0	0	0	0	4.86065	8.85421	14.4861	5.94874	5.61422	4.16603
0.5	0.166667	0.583333	1.7981	2.32314	2.03403	1.4322	3.18245	1.9568	2.14593	3.17253	4.66773	2.04199	3.1823	2.81033	4.13106	3.17602	2.91819	3.23617	2.83268	2.63412	3.23978	4.09079	5.72859	3.74056	2.63876	2.70933	4.67209	5.28727	6.38185	6.31124	3.6753	3.17269	3.27343	3.73257	4.74523	3.07757	3.0198	2.20203	4.01911	6.26102	11.7275	2.13212	2.83103	2.13494
0.666667	0.166667	0.75	4.87763	4.64256	4.37616	1.83913	2.94376	1.93869	1.52958	2.12049	2.45312	1.83979	2.00532	1.42592	4.03365	2.76041	2.25957	2.41006	2.94612	2.46188	1.83639	2.49645	3.81177	1.82495	1.2125	1.72781	2.30849	2.50891	3.49958	2.14429	1.66546	1.26595	4.30771	5.05596	6.7831	2.27316	2.40757	2.36194	3.51944	4.82898	9.092	1.7276	2.63544	2.07134
0.833333	0.166667	0.916667	3.39731	3.43712	3.76666	1.15797	1.73084	1.37027	1.30895	1.84265	2.13936	1.4947	2.48366	1.39314	2.9512	2.71893	3.09363	2.29876	2.65285	2.1951	1.93134	2.16427	4.15464	1.8346	1.3243	1.13845	2.21114	2.57817	3.19957	2.22309	1.52118	1.19956	3.01283	3.83142	5.10436	1.79732	1.83187	1.07618	2.73636	4.68129	8.94954	2.16734	2.48929	1.74278
1	1	1.5	2.8659	3.35726	4.15481	1.13714	1.36837	1.21842	1.30534	1.55268	1.95306	1.45714	1.7023	1.44407	2.97072	2.71395	2.79076	2.21967	2.5837	2.32651	1.70214	2.51435	4.08333	1.68997	1.80746	1.43972	2.04462	2.37511	3.15975	2.14376	1.65605	1.60304	3.0815	4.06585	5.51813	1.47459	1.64205	1.39204	3.20651	5.07921	9.51573	1.89362	2.54408	1.81722
2	1	2.5	2.96651	3.48601	4.26186	1.17873	1.65614	1.25257	1.26064	1.53328	1.85448	1.54177	1.82015	1.4098	3.04875	3.08013	3.37728	2.47681	2.7634	2.60192	1.90658	3.05669	4.73405	1.77584	1.82477	1.53756	1.97226	2.52142	3.55348	1.95021	1.50041	1.86856	3.37833	4.42958	6.02574	1.49283	1.72086	1.36962	3.30776	5.2469	9.91438	1.95688	2.70801	2.31663
3	1	3.5	2.82504	3.70183	4.79427	1.22597	1.57198	1.26408	1.31427	1.76594	2.1336	1.56197	1.75165	1.53697	3.24478	3.29204	3.52993	2.50694	2.91705	2.6606	2.15953	3.33774	5.37751	1.76583	1.99627	1.60401	1.99156	2.5141	3.68764	2.12687	1.81791	1.70202	3.46681	4.62443	6.32368	1.52545	1.85469	1.72517	3.52606	5.66019	10.2353	2.32233	2.95638	2.15393
4	1	4.5	2.94776	3.8184	4.86913	1.40965	1.76072	1.53032	1.5886	1.86471	2.25518	1.57768	1.80434	1.54464	3.3351	3.48748	3.7851	2.9192	3.44295	2.97219	2.05003	3.47743	5.6683	1.84771	1.95892	1.84327	2.05487	2.70844	3.86791	2.09585	1.75722	1.87972	3.74273	4.95058	6.42192	1.68894	2.0292	1.81314	3.5214	5.77662	10.5406	2.46518	3.06923	2.1811
5	2.5	6.25	2.93326	4.03263	5.29735	1.54925	2.02319	1.5815	1.71187	2.00559	2.28859	1.81799	2.12873	1.78606	3.24885	3.68231	4.1196	2.97503	3.40589	3.28113	2.36369	3.71157	6.14535	2.1102	2.15475	1.95631	2.16203	2.83638	4.23822	2.26083	2.13217	2.11539	3.96316	5.18067	6.55599	1.79641	2.13807	1.85964	3.8618	6.1564	10.7773	2.63158	3.34004	2.62492
7.5	2.5	8.75	3.04521	4.16566	5.42848	1.68372	2.05147	1.80371	1.72591	2.1073	2.65375	1.95866	2.30798	1.83657	3.45007	3.99447	4.61085	3.47907	3.76551	3.69173	2.49357	4.06877	6.4928	2.45342	2.28337	1.9653	2.33072	2.97634	4.50826	2.37246	2.37506	2.40592	4.08636	5.23248	6.54406	1.99453	2.28957	1.99695	4.05044	6.35667	10.844	2.97238	3.70142	2.96176
10	5	12.5	2.88885	4.28399	5.83228	1.89596	2.25281	2.03103	1.97824	2.42268	2.76667	2.1022	2.5623	2.15525	3.8358	4.48003	5.18708	3.67293	4.21235	3.89508	2.75991	4.56827	7.30588	2.52223	2.55575	2.32013	2.37196	3.13896	4.91612	2.54048	2.36812	2.36473	4.09671	5.22387	6.34521	2.26015	2.49895	2.11964	4.36635	6.8576	11.1516	3.23711	4.10774	3.31647
15	5	17.5	2.94749	4.309	5.69983	1.93336	2.31915	2.08403	2.06709	2.62121	2.98697	2.20986	2.61894	2.3161	4.08205	4.78325	5.70227	3.99368	4.47301	4.29	2.9888	4.98038	7.67659	2.59552	2.66713	2.58952	2.64936	3.4214	5.22232	2.76437	2.59065	2.71796	4.08633	4.996	5.93576	2.30383	2.52953	2.17439	4.45401	6.82512	10.7186	3.65539	4.28109	3.40563
20	10	25	2.7045	4.10613	5.40508	2.16457	2.48769	2.23442	2.19733	2.78611	3.31003	2.45071	2.85641	2.43631	4.1823	5.23068	6.29322	4.31026	4.7596	4.65537	2.96179	5.05588	8.02808	2.74946	2.96863	2.70311	2.62883	3.61801	5.78536	2.89089	2.89251	2.78503	3.82	4.7192	5.46884	2.55423	2.64339	2.41488	4.59811	6.94044	10.5305	3.9226	4.69521	3.68164
30	10	35	2.54817	4.00385	5.09637	2.17199	2.4385	2.18644	2.33063	2.9762	3.56186	2.62258	2.93866	2.59869	4.35482	5.55928	6.79673	4.45147	4.95844	4.96721	3.12427	5.39855	8.23613	2.92202	3.08242	2.87658	2.87869	3.85781	6.12387	3.0087	3.02785	2.96185	3.56392	4.33436	4.92542	2.64686	2.70259	2.41131	5.03367	7.32004	10.1969	4.07816	4.63228	3.92195
40	10	45	2.44975	3.71424	4.77374	2.19702	2.45026	2.19173	2.49052	2.97353	3.22363	2.61049	2.93934	2.64307	4.68481	5.87251	6.9662	4.5664	5.03025	5.02022	3.37654	5.64451	8.23502	3.00709	3.16899	2.94121	3.05674	4.01386	6.3498	3.20654	3.01769	3.16195	3.51174	4.07833	4.45763	2.66506	2.75925	2.45143	5.28223	6.97592	9.35116	3.95513	4.47345	3.73416
50	10	55	2.43078	3.62075	4.5135	2.21952	2.4498	2.21925	2.63914	3.14847	3.40988	2.71875	2.97661	2.62113	4.56254	5.75498	7.10005	4.55114	5.07378	5.1793	3.61748	5.82834	8.15522	2.96613	3.14975	2.9299	3.14822	4.1112	6.45427	3.22064	3.17165	3.18097	3.36487	3.86138	4.19697	2.59381	2.684	2.45872	5.51275	6.98186	9.22292	4.05859	4.41701	3.78918
60	10	65	2.30557	3.48544	4.39176	2.19774	2.41015	2.19166	2.69977	3.17855	3.33982	2.71781	3.01115	2.75378	4.73668	5.99988	7.25429	4.64717	5.06319	5.27244	3.58399	5.80955	8.2552	3.06574	3.08224	3.17149	3.23816	4.17754	6.55942	3.3613	3.16158	3.19753	3.24454	3.66887	4.04179	2.62256	2.61694	2.41357	5.17576	6.80361	8.85431	4.0515	4.26879	3.76716
70	10	75	2.23066	3.40559	4.26352	2.19108	2.33313	2.16304	2.70278	3.2176	3.42139	2.69875	2.96435	2.82673	4.73242	6.03615	7.27912	4.68776	5.03287	5.28697	3.79468	5.91363	7.97879	3.10694	3.31477	3.11202	3.32533	4.17598	6.44119	3.25892	3.18388	3.2202	3.12647	3.53841	3.8796	2.596	2.65619	2.47406	4.99147	6.60992	8.3492	3.90542	4.06758	3.66575
80	10	85	2.23845	3.36801	4.14466	2.34347	2.42131	2.25747	2.72022	3.18208	3.34095	2.70706	2.94942	2.82777	4.71519	6.07494	7.34909	4.63185	5.01889	5.34915	3.84364	5.81032	7.88298	3.0505	3.21695	3.11126	3.2361	4.16137	6.32854	3.36092	3.31657	3.32792	3.07503	3.45179	3.7177	2.56677	2.64375	2.40417	4.95019	6.47255	8.0636	3.77688	3.95289	3.57498

## Sheet: AIFs
These are the arterial parent plasma input function, i.e. the measered arterial blood activity concentrations corrected for whole blood to plasma ratio and corrected for labeled metabolites. The functions have been corrected for global delay. Activity has been corrected for decay.
Time	Activity concentration
	P1	P2	P3	P4	P5	P6	P7
minutes	kBq/mL	kBq/mL	kBq/mL	kBq/mL	kBq/mL	kBq/mL	kBq/mL
0	0	0	0.28418	0.0178	0	0	0
0.0166667	0	0	0.1619	0	0	0	0
0.0333333	0	0	0.11796	0	0	0	0
0.05	0	0	0.08551	0	0	0	0
0.0666667	0	0.00819	0.08615	0.10478	0	0	0
0.0833333	0.01122	0.14339	0.06069	0.03279	0	0	0
0.1	0.05794	0.0094	0.02479	0	0.01463	0	0
0.116667	0.08828	0	0.08992	0	0.1177	0	0
0.133333	0.04156	0	0.12293	0	0	0	0
0.15	0	0	0.09291	0	0	0	0
0.166667	0	0	0.2045	0.08367	0	0	0
0.183333	0	0	0.18813	0.05415	0	0	0.20119
0.2	0	0	0.48087	0	0	0	0.46605
0.216667	0	0	0.70959	0	0	0	0.7296
0.233333	0	0	0.66768	0	0	0.03853	1.12175
0.25	0	0	0.93681	0	0	0.14275	1.62971
0.266667	0.04247	0	0.90164	0	0.0142	0	2.17352
0.283333	0.0891	0	1.21902	0	0.04611	0.00638	3.25101
0.3	0.09607	0	1.34171	0	0.05149	0.16562	3.8124
0.316667	0.09603	0	3.37548	0.05504	0.0195	0.16923	3.65078
0.333333	0.096	0	8.50907	0.13431	0.0125	0.02389	4.10856
0.35	0.09597	0	23.0509	0.08624	0.04453	0	4.82081
0.366667	0.06272	0	47.5789	0.13671	0.05284	0	5.66467
0.383333	0.01625	0	75.1346	0.44695	0.02081	0	9.0609
0.4	0	0.11275	104.804	1.00764	0	0	15.2708
0.416667	0	0.55251	128.877	2.80863	0	0.09226	29.7237
0.433333	0	1.63788	145.743	5.82832	0.29002	0.08609	48.1739
0.45	0	3.6045	159.688	11.8035	1.18196	0	65.6484
0.466667	0.0728	6.18606	154.477	21.3928	3.15395	0	83.6235
0.483333	0.21272	10.721	150.559	31.3899	7.70615	0.05075	93.0491
0.5	0.94651	17.5814	137.269	42.9814	14.1738	0.12696	100.101
0.516667	2.39101	29.8975	121.692	59.1721	25.9567	0.31665	105.05
0.533333	4.63506	43.7641	109.288	67.1638	38.0199	1.94974	102.877
0.55	8.12927	54.0399	95.373	78.4261	51.0171	3.72529	94.1067
0.566667	12.2382	68.7398	86.3055	96.8956	62.9765	16.2976	90.3322
0.583333	17.6254	71.9051	75.9832	89.9171	71.1806	35.9143	79.4754
0.6	22.8979	83.1056	67.297	91.3339	78.6734	49.379	73.7007
0.616667	27.8425	83.5067	62.537	86.6355	83.2583	71.9512	64.5943
0.633333	32.5408	80.8653	56.3629	92.3553	86.5637	88.5851	57.6544
0.65	36.2001	77.633	51.6419	87.4662	83.6479	103.651	50.6034
0.666667	40.4035	72.5327	52.132	82.4479	80.6681	109.442	45.712
0.683333	48.4288	71.5739	46.9267	84.1028	77.2842	114.009	42.5128
0.7	56.1451	66.3171	46.7281	83.8865	74.0526	118.005	38.9372
0.716667	59.0992	59.9805	46.9499	81.9547	72.0317	115.622	35.9425
0.733333	62.0513	56.3014	48.4171	78.356	69.8169	111.408	34.2049
0.75	73.0896	54.1265	46.2296	76.7448	65.5014	110.892	33.1361
0.766667	84.1208	53.8272	45.7746	67.3962	61.1765	108.226	33.3272
0.783333	92.7555	48.2335	42.1093	64.4775	56.6212	101.661	32.3531
0.8	101.205	41.0565	41.4498	63.018	52.2099	102.52	33.5639
0.816667	108.81	42.853	41.1091	64.4082	51.6393	92.0303	34.2395
0.833333	116.273	41.9785	38.4667	55.7584	51.0575	92.504	30.3861
0.85	114.972	41.4469	35.7197	52.1961	49.7246	85.1673	31.214
0.866667	111.484	37.9645	33.9581	47.2726	48.3929	74.6744	30.8414
0.883333	102.133	35.0921	33.5822	46.6484	46.7134	74.144	30.8734
0.9	90.7291	30.1614	33.0583	47.6476	45.0304	68.3025	30.8153
0.916667	84.2306	32.3449	31.4487	44.489	44.2355	61.0578	29.683
0.933333	80.1484	30.2894	31.0194	39.7036	43.4782	57.7146	29.2785
0.95	76.6193	32.8399	31.0428	40.3492	43.8225	55.7395	29.2506
0.966667	73.4592	33.4597	29.0053	42.8927	44.2426	56.9961	27.938
0.983333	68.5942	29.8448	30.6457	40.2365	44.2024	58.9656	25.9154
1	62.2787	32.1402	27.8327	38.6157	44.1137	57.4334	25.1898
1.01667	57.1942	29.7074	27.4323	39.6898	45.8644	51.9892	25.8187
1.03333	53.4962	28.7323	24.3039	37.2135	47.875	45.1969	25.8496
1.05	51.368	32.6037	26.7067	34.7795	46.2378	43.7511	24.7061
1.06667	51.5915	32.3792	25.1384	35.8045	43.9849	45.6973	23.4166
1.08333	50.6729	29.6745	24.7274	33.3604	42.1122	46.698	22.2464
1.1	47.5388	30.4545	24.3122	30.5227	40.3164	46.8768	22.2587
1.11667	45.1113	30.7251	24.3416	30.0343	39.4627	46.0786	21.7302
1.13333	44.5896	28.6109	24.2916	30.0956	38.8375	40.6043	23.2767
1.15	43.8523	26.845	24.3124	31.5971	36.9542	47.3141	23.2535
1.16667	42.252	23.4987	23.4634	28.2858	34.7186	46.6427	22.4477
1.18333	40.6786	22.7577	22.062	28.2733	34.084	42.0604	21.58
1.2	39.2662	24.4611	22.0153	26.6622	33.9683	37.9921	21.2389
1.21667	38.0936	23.8837	22.214	28.3612	33.7602	38.1631	21.8868
1.23333	39.6688	23.7232	22.4657	25.7913	33.5173	38.3173	22.4819
1.25	41.2095	23.0637	23.7832	25.388	32.7176	38.377	22.6345
1.26667	39.4322	22.9661	21.4274	26.3987	31.6861	38.2717	21.9223
1.28333	37.656	21.1238	21.1942	26.5831	31.0036	36.3912	20.656
1.3	35.4775	20.575	20.9611	26.1814	30.4816	34.5412	21.2951
1.31667	33.2746	21.4633	20.995	25.7428	29.4259	34.3084	20.5228
1.33333	32.1867	22.1976	21.3462	25.2758	28.0905	34.0766	21.4301
1.35	31.2513	22.2846	20.5479	24.4674	27.147	33.6342	21.8285
1.36667	31.0587	20.9254	19.984	23.3683	26.4387	33.1823	19.7276
1.38333	31.0403	20.2782	20.1081	22.4912	25.6188	32.2059	21.6375
1.4	30.6205	20.0531	20.7235	21.8232	24.7249	31.1642	19.9227
1.41667	30.0598	19.3881	19.9366	21.7328	24.5873	29.7618	20.004
1.43333	29.311	22.8174	18.9296	22.2316	25.0073	28.2838	20.1018
1.45	28.4739	20.0404	19.2705	21.9094	24.7789	27.629	20.0422
1.46667	29.6058	17.6304	19.7358	20.6805	24.0103	27.2417	19.7393
1.48333	31.9432	17.0777	19.5419	20.1162	23.5756	26.9473	19.5126
1.5	31.2729	18.8627	19.0949	20.3804	23.4425	26.6961	19.6693
1.51667	28.1442	16.8439	19.5906	20.5067	23.1819	27.0098	19.7555
1.53333	26.936	18.5772	19.7667	20.4386	22.7967	27.6682	19.2083
1.55	27.8062	20.67	19.6164	20.5285	22.6018	27.4388	18.6619
1.56667	28.3529	18.714	18.762	20.8602	22.6165	26.5006	18.1215
1.58333	28.4536	17.7415	18.1511	20.7189	22.4534	25.0862	17.5816
1.6	28.5542	18.1467	18.4397	19.7894	22.0689	23.1778	18.2647
1.61667	28.1234	17.157	17.851	19.1803	21.388	22.3628	18.9851
1.63333	27.511	16.5924	18.5882	19.1789	20.2983	23.0209	18.9016
1.65	26.8991	15.8696	19.1553	19.1461	19.4768	23.41	18.734
1.66667	26.2875	15.1921	18.7265	19.0452	19.0643	23.3126	18.3143
1.68333	25.8244	14.9577	18.1109	19.1176	19.0271	22.8287	17.8452
1.7	25.4734	16.1691	17.7299	19.6144	19.6277	21.3999	17.9395
1.71667	25.1226	16.1601	17.6412	19.9438	19.5842	20.5356	18.2019
1.73333	24.772	15.7935	17.5927	19.8093	18.3473	21.5496	18.0975
1.75	24.4216	16.1106	17.2348	19.4788	17.6878	22.3216	17.9571
1.76667	24.3405	15.9343	17.17	18.5445	18.2234	21.8346	17.927
1.78333	24.5232	15.5868	17.0588	17.8129	18.7493	21.3743	17.8971
1.8	24.7057	15.0167	16.4198	17.7784	19.2531	21.1731	17.8672
1.81667	24.8882	13.8455	17.8834	17.7633	19.6998	20.9459	17.8376
1.83333	25.0705	13.0848	17.9045	17.8279	19.9897	19.856	17.808
1.85	25.0048	14.1892	18.229	17.7442	20.2723	18.7687	17.7786
1.86667	24.6172	15.0566	17.0861	16.9107	20.532	19.6365	17.7493
1.88333	24.2299	14.1916	17.3653	16.3186	20.6866	20.5733	17.7201
1.9	23.8427	13.3915	17.1791	17.1492	20.459	20.3676	17.691
1.91667	23.4558	13.6932	16.833	17.8215	20.2081	20.0288	17.6621
1.93333	23.2355	13.9946	16.6258	17.3884	19.8606	19.5435	17.6333
1.95	23.2986	14.5988	16.4872	17.0584	19.6269	19.0293	17.6046
1.96667	23.3616	15.2071	16.7075	17.6541	19.9462	18.9484	17.576
1.98333	23.4246	14.2928	16.8886	18.1028	20.1116	19.0004	17.5476
2	23.4876	13.2469	16.6751	16.7408	19.3731	18.5134	17.5193
2.01667	23.3669	14.192	16.4649	15.4822	18.6775	17.7914	17.491
2.03333	22.8377	15.4737	16.4012	16.1791	18.3033	17.3147	17.4629
2.05	22.3089	14.9162	16.3377	16.8807	18.0167	16.9822	17.435
2.06667	21.7803	13.8708	16.0322	17.7409	18.6654	17.1857	17.4071
2.08333	21.2521	13.6249	15.717	18.5947	19.2052	17.8007	17.3793
2.1	20.8727	13.682	15.5785	18.2289	17.8938	17.7902	17.3517
2.11667	20.9513	13.8794	15.4608	17.8633	16.6763	17.1435	17.3241
2.13333	21.0298	14.1506	15.7846	17.3048	17.9912	16.7838	17.2967
2.15	21.1082	14.1329	16.2015	16.7416	19.2778	16.8033	17.2694
2.16667	21.1866	13.9147	16.0919	16.5834	18.8532	16.3448	17.2421
2.18333	21.1852	13.5845	15.8164	16.4488	18.4292	15.0743	17.215
2.2	20.8075	13.1532	15.6408	16.3752	18.1917	14.2631	17.188
2.21667	20.4301	13.2419	15.5082	16.307	18.2992	14.4936	17.1611
2.23333	20.0528	13.9404	15.7652	16.5968	18.4066	14.9777	17.1343
2.25	19.6759	13.8308	16.2505	16.9263	18.5138	16.2873	17.1076
2.26667	19.3869	12.4849	16.3981	16.6763	18.5763	17.4409	17.081
2.28333	19.8463	11.5324	16.2807	16.3437	18.4424	17.8437	17.0545
2.3	20.3054	11.3769	16.0112	16.7985	18.3087	18.1695	17.0281
2.31667	20.7643	11.2941	15.5899	17.392	18.1753	17.8777	17.0018
2.33333	21.2228	11.4127	15.4578	17.1403	18.0421	17.5825	16.9756
2.35	21.6519	11.4007	15.7083	16.7096	17.9392	17.1879	16.9495
2.36667	21.3791	10.8495	15.8236	16.6194	17.9943	16.794	16.9235
2.38333	21.1064	10.5007	15.699	16.617	18.0494	16.6006	16.8976
2.4	20.8339	11.5027	15.5605	16.1782	18.1044	16.4137	16.8718
2.41667	20.5616	12.484	15.3893	15.6128	18.1593	15.9132	16.8461
2.43333	20.2894	13.1784	15.3083	15.6973	18.1879	15.3827	16.8205
2.45	19.9875	13.8722	15.5121	15.9923	18.0413	15.643	16.7949
2.46667	19.6852	12.4205	15.6095	16.3121	17.895	16.0421	16.7695
2.48333	19.3831	10.9591	15.2061	16.6413	17.7489	17.0299	16.7442
2.5	19.0812	11.1367	14.8702	16.8771	17.603	18.1822	16.7189
2.51667	18.7794	11.4374	15.1053	17.0737	17.4406	17.3079	16.6937
2.53333	18.8499	11.8173	15.3342	16.0727	17.1269	15.6091	16.6687
2.55	18.9549	12.2094	15.4212	14.5216	16.8137	15.008	16.6437
2.56667	19.0598	12.0666	15.5081	14.7646	16.501	14.9969	16.6188
2.58333	19.1647	11.7902	15.4577	15.9518	16.1889	14.9657	16.594
2.6	19.2696	11.6486	15.4046	16.036	15.9169	14.9203	16.5693
2.61667	19.3743	11.5556	15.2595	15.4729	16.102	15.0685	16.5446
2.63333	19.4791	11.926	15.1061	15.4091	16.2868	15.3985	16.5201
2.65	19.5389	12.5296	14.9264	15.6713	16.4713	15.2513	16.4956
2.66667	19.5015	13.0601	14.742	15.0119	16.6555	14.5222	16.4713
2.68333	19.464	13.5418	14.4675	13.6859	16.8138	14.1802	16.447
2.7	19.4266	13.3435	14.1677	13.6009	16.5316	14.442	16.4228
2.71667	19.3892	12.5549	14.0055	14.4904	16.2499	14.924	16.3987
2.73333	19.3518	11.8927	13.8995	14.8852	15.9685	15.8629	16.3746
2.75	19.3144	11.3757	14.2303	14.8503	15.6877	16.3244	16.3507
2.76667	19.2771	11.3067	14.8064	14.8653	15.4131	15.3958	16.3268
2.78333	18.9346	11.909	14.8922	14.9291	15.3272	14.688	16.303
2.8	18.4708	12.1463	14.6234	14.7204	15.2415	14.9155	16.2793
2.81667	18.0073	11.66	14.2718	14.2225	15.1559	15.1467	16.2557
2.83333	17.544	11.2965	13.8425	14.3226	15.0704	15.4064	16.2321
2.85	17.081	11.264	13.6777	15.1102	14.9846	15.6657	16.2087
2.86667	16.9339	11.2997	13.8423	15.3682	14.8476	15.9252	16.1853
2.88333	16.9605	11.5991	13.9597	14.9387	14.7108	16.1844	16.162
2.9	16.9871	11.924	14.0005	14.7625	14.5742	15.509	16.1388
2.91667	17.0138	12.4053	14.1509	14.9583	14.4379	14.8253	16.1156
2.93333	17.0404	12.7914	14.5455	15.1288	14.3017	14.0491	16.0925
2.95	17.1918	12.0055	14.764	15.2593	14.3788	13.2661	16.0695
2.96667	17.4335	11.223	14.4265	15.2311	14.4591	13.8011	16.0466
2.98333	17.675	11.0093	14.0865	14.9329	14.5392	14.5676	16.0238
3	17.9165	10.7958	13.7341	14.6907	14.6193	14.2679	16.001
3.01667	18.1578	11.0365	13.4348	14.5574	14.6992	13.6858	15.9783
3.03333	18.0367	11.306	13.5219	14.3195	14.8558	14.4029	15.9557
3.05	17.5814	11.1262	13.6113	13.8541	15.0155	15.5988	15.9331
3.06667	17.1264	10.8825	13.7444	13.7647	15.1749	15.3135	15.9107
3.08333	16.6716	11.1033	13.8773	14.5522	15.3341	14.2671	15.8883
3.1	16.2171	11.4329	14.2297	14.8864	15.4931	13.5758	15.866
3.11667	16.1199	11.4704	14.5862	14.0268	15.2475	13.131	15.8437
3.13333	16.4503	11.408	14.4335	13.4031	14.9719	12.6524	15.8215
3.15	16.7805	10.6746	14.2366	13.4674	14.6967	12.1439	15.7994
3.16667	17.1106	9.61847	14.1188	13.6932	14.4219	12.5716	15.7774
3.18333	17.4404	9.61086	14.0144	14.4451	14.1475	14.0958	15.7554
3.2	17.5219	10.2731	14.1386	14.8835	14.0956	15.0105	15.7335
3.21667	17.2154	10.6195	14.3253	14.1082	14.0685	14.9748	15.7117
3.23333	16.9092	10.7076	14.4346	13.3332	14.0414	14.9391	15.69
3.25	16.6031	10.723	14.5138	13.0629	14.0144	14.6431	15.6683
3.26667	16.2971	10.6611	14.3178	13.2308	13.9874	14.2306	15.6467
3.28333	16.0826	10.4493	13.9771	13.3986	13.9564	13.8188	15.6251
3.3	16.0576	10.0265	13.7257	13.5663	13.9249	13.4076	15.6037
3.31667	16.0326	9.93067	13.5378	13.679	13.8934	13.2015	15.5823
3.33333	16.0076	10.4416	13.5369	13.6979	13.862	13.2044	15.5609
3.35	15.9826	10.7863	13.7085	13.7169	13.8307	13.2073	15.5397
3.36667	15.9519	10.7245	13.792	13.7358	13.8349	13.2102	15.5185
3.38333	15.9045	10.6626	13.7721	13.7547	13.8454	13.2132	15.4974
3.4	15.8571	10.6004	13.6572	13.7625	13.8558	13.2161	15.4763
3.41667	15.8098	10.4343	13.3941	13.7499	13.8663	13.2191	15.4553
3.43333	15.7624	9.67967	13.1895	13.7373	13.8768	13.2221	15.4344
3.45	15.7575	9.08536	13.1087	13.7247	13.7186	13.2251	15.4135
3.46667	15.939	10.1074	13.1232	13.712	13.526	13.2281	15.3927
3.48333	16.1204	11.0902	13.4085	13.7165	13.3337	13.2112	15.3719
3.5	16.3017	10.819	13.643	13.7565	13.1417	13.1602	15.3513
3.51667	16.483	10.5479	13.669	13.7965	12.9499	13.1094	15.3307
3.53333	16.6252	10.0468	13.6827	13.8364	12.7877	13.0586	15.3101
3.55	16.4822	9.53648	13.61	13.8763	12.6329	13.0079	15.2896
3.56667	16.3393	9.45219	13.5756	13.8924	12.4782	12.9524	15.2692
3.58333	16.1964	9.42056	14.1419	13.8531	12.3238	12.886	15.2489
3.6	16.0537	9.73773	14.7077	13.8139	12.1696	12.8196	15.2286
3.61667	15.9053	10.1262	13.71	13.7747	12.3496	12.7533	15.2084
3.63333	15.6669	10.2163	12.7052	13.7355	12.6235	12.6872	15.1882
3.65	15.4287	10.2148	13.2657	13.6962	12.8971	12.6602	15.1681
3.66667	15.1906	9.85902	13.9526	13.6568	13.1703	12.7603	15.1481
3.68333	14.9527	9.34806	13.6131	13.6174	13.4431	12.8603	15.1281
3.7	14.7149	9.10115	13.1069	13.578	13.4228	12.9602	15.1082
3.71667	14.7109	9.00926	12.9055	13.5387	13.3101	13.06	15.0883
3.73333	14.7081	9.15642	12.7804	13.4439	13.1975	13.165	15.0685
3.75	14.7053	9.48375	12.8723	13.1874	13.0852	13.2972	15.0488
3.76667	14.7025	9.58686	13.0423	12.931	12.9729	13.4291	15.0291
3.78333	14.6997	9.46592	13.142	12.6748	12.7497	13.5609	15.0095
3.8	15.0162	9.42568	13.2065	12.4187	12.4866	13.6925	14.99
3.81667	15.3585	9.49233	13.2525	12.2369	12.224	13.7904	14.9705
3.83333	15.7005	9.55896	13.2864	12.3037	11.9616	13.5853	14.951
3.85	16.0423	9.61519	13.2839	12.3704	11.6996	13.3805	14.9316
3.86667	16.3839	9.66716	13.2498	12.4371	11.827	13.1759	14.9123
3.88333	16.1925	9.71912	13.0948	12.5037	12.113	12.9717	14.8931
3.9	15.9109	9.77105	12.8037	12.547	12.3986	12.7686	14.8739
3.91667	15.6295	9.86404	12.7204	12.5027	12.6839	12.5912	14.8547
3.93333	15.3482	9.99974	12.9419	12.4584	12.9689	12.414	14.8356
3.95	15.0671	10.1354	13.1633	12.414	12.9896	12.2371	14.8166
3.96667	15.0927	10.271	13.2034	12.3698	12.8918	12.0603	14.7977
3.98333	15.1997	10.4065	13.1678	12.3635	12.7942	11.8839	14.7788
4	15.3067	10.4609	13.1323	12.5249	12.6967	12.0618	14.7599
4.01667	15.4137	10.4056	13.0968	12.6862	12.5994	12.2523	14.7411
4.03333	15.5205	10.3503	13.0773	12.8474	12.5691	12.4426	14.7224
4.05	15.5268	10.2951	13.0737	13.0085	12.5717	12.6327	14.7037
4.06667	15.495	10.24	13.0702	13.1434	12.5743	12.8226	14.685
4.08333	15.4632	10.176	13.0666	13.1409	12.5769	12.8348	14.6665
4.1	15.4314	10.0963	13.0631	13.1385	12.5796	12.8285	14.6479
4.11667	15.3996	10.0167	13.0415	13.136	12.455	12.8221	14.6295
4.13333	15.2623	9.93717	12.996	13.1335	12.259	12.8158	14.6111
4.15	15.0694	9.85766	12.9506	13.1289	12.0633	12.8095	14.5927
4.16667	14.8766	9.78843	12.9052	13.1107	11.8679	12.7097	14.5744
4.18333	14.684	9.74314	12.8598	13.0926	11.6727	12.5922	14.5562
4.2	14.4915	9.69787	12.8537	13.0745	11.5567	12.4749	14.538
4.21667	14.5129	9.65263	12.9155	13.0563	11.4924	12.3578	14.5198
4.23333	14.686	9.60742	12.9774	13.0346	11.4282	12.2408	14.5018
4.25	14.859	9.58632	13.0392	12.9849	11.364	12.2662	14.4837
4.26667	15.0319	9.64362	13.101	12.9352	11.3	12.3341	14.4657
4.28333	15.2047	9.7009	13.1148	12.8856	11.147	12.4019	14.4478
4.3	15.3814	9.75815	13.0166	12.836	10.9296	12.4696	14.43
4.31667	15.5617	9.81539	12.9185	12.7704	10.7125	12.5373	14.4121
4.33333	15.7418	9.88068	12.8205	12.5524	10.4957	12.5603	14.3944
4.35	15.9218	9.9868	12.7226	12.3345	10.2791	12.5647	14.3766
4.36667	16.1018	10.0929	12.6468	12.1168	10.3548	12.5691	14.359
4.38333	15.9252	10.1989	12.6424	11.8992	10.6597	12.5735	14.3414
4.4	15.3388	10.3049	12.638	11.7045	10.9643	12.578	14.3238
4.41667	14.7527	10.3988	12.6336	11.8129	11.2685	12.5287	14.3063
4.43333	14.167	10.3779	12.6293	11.9212	11.5724	12.4494	14.2889
4.45	13.5816	10.3571	12.625	12.0294	11.7178	12.3701	14.2715
4.46667	13.192	10.3362	12.6206	12.1376	11.7257	12.2909	14.2541
4.48333	13.1021	10.3154	12.6163	12.2402	11.7337	12.2119	14.2368
4.5	13.0121	10.283	12.612	12.2379	11.7416	12.0781	14.2195
4.51667	12.9223	9.93036	12.6078	12.2356	11.7495	11.9048	14.2023
4.53333	12.8325	9.57788	12.6035	12.2333	11.7028	11.7317	14.1852
4.55	12.8317	9.22556	12.5993	12.2309	11.6037	11.5589	14.1681
4.56667	13.0117	8.8734	12.595	12.2236	11.5047	11.3862	14.151
4.58333	13.1916	8.52141	12.5908	12.022	11.4058	11.3078	14.134
4.6	13.3714	8.59722	12.5866	11.8205	11.307	11.3181	14.117
4.61667	13.5511	8.68397	12.5824	11.6191	11.1633	11.3284	14.1001
4.63333	13.8137	8.77068	12.5782	11.4178	10.9711	11.3386	14.0833
4.65	14.3063	8.85736	12.574	11.2166	10.7792	11.3489	14.0665
4.66667	14.7985	8.944	12.5699	11.0729	10.5874	11.3036	14.0497
4.68333	15.2905	8.96736	12.5657	10.9292	10.3959	11.1892	14.033
4.7	15.7822	8.98408	12.5616	10.7856	10.3807	11.0749	14.0163
4.71667	16.1282	9.0008	12.5575	10.6421	10.5806	10.9608	13.9997
4.73333	15.8926	9.01752	12.5534	10.4987	10.7803	10.8468	13.9831
4.75	15.6571	9.03423	12.5493	10.4933	10.9797	10.8421	13.9666
4.76667	15.4217	9.05094	12.5452	10.4914	11.179	11.0194	13.9501
4.78333	15.1865	9.06765	12.5412	10.4895	11.2065	11.1965	13.9337
4.8	15.0338	9.08435	12.5371	10.4876	11.0017	11.3734	13.9173
4.81667	15.3874	9.10105	12.533	10.4857	10.7973	11.5501	13.901
4.83333	15.7408	9.11775	12.529	10.4838	10.593	11.6091	13.8847
4.85	16.0939	9.13444	12.525	10.4819	10.389	11.4066	13.8685
4.86667	16.4469	9.15113	12.521	10.48	10.2737	11.2043	13.8523
4.88333	16.7534	9.16782	12.517	10.4781	10.291	11.0023	13.8361
4.9	16.489	9.18451	12.513	10.4762	10.3083	10.8005	13.82
4.91667	16.2247	9.20119	12.509	10.4742	10.3256	10.6446	13.804
4.93333	15.9605	9.21787	12.5051	10.4723	10.3428	10.6299	13.788
4.95	15.6965	9.23455	12.5011	10.4704	10.3601	10.6153	13.772
4.96667	15.4319	9.25122	12.4972	10.4685	10.3774	10.6006	13.7561
4.98333	15.0233	9.26789	12.4933	10.4666	10.3946	10.586	13.7402
5	14.6149	9.28456	12.4894	10.4647	10.4119	10.5714	13.7244
5.01667	14.2067	9.30123	12.4855	10.4628	10.4291	10.5568	13.7086
5.03333	13.7988	9.31789	12.4816	10.4609	10.4463	10.5422	13.6929
5.05	13.391	9.33455	12.4777	10.4589	10.4635	10.5277	13.6772
5.06667	13.6335	9.3512	12.4738	10.457	10.4808	10.5132	13.6615
5.08333	13.921	9.36786	12.47	10.4551	10.498	10.4987	13.6459
5.1	14.2083	9.38451	12.4238	10.4532	10.5152	10.4843	13.6303
5.11667	14.4955	9.40116	12.372	10.4513	10.5324	10.4699	13.6148
5.13333	14.7825	9.4178	12.3201	10.4494	10.5496	10.4555	13.5994
5.15	14.7734	9.35303	12.2684	10.4474	10.5668	10.4411	13.5839
5.16667	14.7202	9.28309	12.2166	10.4455	10.5839	10.4267	13.5685
5.18333	14.667	9.21318	12.1649	10.4436	10.6011	10.4124	13.5532
5.2	14.6138	9.14331	12.1133	10.4418	10.6182	10.3981	13.5379
5.21667	14.5606	9.07346	12.0617	10.4404	10.5593	10.3838	13.5226
5.23333	14.6764	9.00365	12.0101	10.439	10.4694	10.3695	13.5074
5.25	14.8331	8.93387	11.9585	10.4375	10.3796	10.3553	13.4923
5.26667	14.9896	8.86413	11.907	10.4361	10.2898	10.3411	13.4771
5.28333	15.146	8.79441	11.8556	10.4347	10.2002	10.3269	13.462
5.3	15.3024	8.72473	11.8042	10.4333	10.1107	10.3019	13.447
5.31667	15.1858	8.65507	11.7528	10.4318	10.0212	10.2637	13.432
5.33333	14.9734	8.58545	11.7015	10.4304	9.93192	10.2256	13.417
5.35	14.7612	8.51586	11.6502	10.429	9.8427	10.1875	13.4021
5.36667	14.549	8.4463	11.5989	10.4275	9.75357	10.1495	13.3872
5.38333	14.337	8.37677	11.5477	10.4261	9.66455	10.1115	13.3724
5.4	14.2665	8.30727	11.4965	10.4246	9.57562	10.0735	13.3576
5.41667	14.2641	8.2378	11.4454	10.4232	9.48679	10.0356	13.3428
5.43333	14.2616	8.16836	11.3942	10.4218	9.39806	9.99778	13.3281
5.45	14.2592	8.09895	11.3432	10.4204	9.30943	9.95998	13.3135
5.46667	14.2568	8.02958	11.2922	10.4189	9.22089	9.92221	13.2988
5.48333	14.2297	7.96023	11.2412	10.4175	9.13245	9.8845	13.2842
5.5	14.0682	7.89091	11.1902	10.416	9.04411	9.84682	13.2697
5.51667	13.9068	7.82162	11.1393	10.4146	8.95586	9.8092	13.2552
5.53333	13.7455	7.75236	11.0884	10.4132	8.86771	9.77162	13.2407
5.55	13.5843	7.68314	11.0376	10.4117	8.78372	9.73408	13.2263
5.56667	13.4231	7.61394	10.9868	10.4103	8.96721	9.69659	13.2119
5.58333	13.2621	7.54477	10.936	10.4089	9.15053	9.65914	13.1975
5.6	12.9081	7.47563	10.8853	10.4074	9.33367	9.62174	13.1832
5.61667	12.4756	7.55322	10.8346	10.406	9.51665	9.58438	13.169
5.63333	12.0432	7.63454	10.7839	10.4046	9.69946	9.54706	13.1547
5.65	11.6111	7.71584	10.7333	10.4031	9.52502	9.50979	13.1406
5.66667	11.1792	7.7971	10.6827	10.257	9.34347	9.47256	13.1264
5.68333	10.7476	7.87834	10.6322	10.0546	9.1621	9.35911	13.1123
5.7	10.3162	7.76666	10.5816	9.85231	8.98091	9.20563	13.0982
5.71667	9.88505	7.63594	10.5312	9.65017	8.7999	9.05231	13.0842
5.73333	9.45415	7.50528	10.4807	9.44815	8.92408	8.89914	13.0702
5.75	9.02348	7.37467	10.4303	9.51679	9.06418	8.74613	13.0562
5.76667	8.59305	7.24411	10.38	9.70131	9.20416	8.78915	13.0423
5.78333	8.16286	7.36588	10.3296	9.88572	9.34401	8.96821	13.0284
5.8	7.73291	7.53388	10.2793	10.07	9.48374	9.14709	13.0146
5.81667	7.3032	7.70181	10.3121	10.2542	9.63133	9.3258	13.0008
5.83333	6.87373	7.86968	10.4199	10.1263	9.77939	9.50435	12.987
5.85	6.4445	8.03749	10.5277	9.84819	9.92732	9.57924	12.9733
5.86667	6.31218	8.05887	10.6354	9.57029	10.0751	9.56047	12.9596
5.88333	6.39037	8.03897	10.7431	9.29254	10.2228	9.54172	12.946
5.9	6.46851	8.01907	10.8136	9.01497	10.0635	9.52301	12.9323
5.91667	6.54661	7.99919	10.8405	8.90467	9.87394	9.50431	12.9188
5.93333	6.62467	7.97932	10.8674	8.8844	9.68462	9.46027	12.9052
5.95	6.70268	7.99721	10.8943	8.86414	9.49549	9.3859	12.8917
5.96667	6.78065	8.03015	10.9212	8.84389	9.30653	9.31161	12.8783
5.98333	6.85857	8.06308	10.9291	8.82365	9.42501	9.2374	12.8648
6	6.93645	8.096	10.9079	8.98752	9.58135	9.16326	12.8514
6.01667	7.01429	8.12891	10.8867	9.25937	9.73755	9.21329	12.8381
6.03333	7.09208	8.19618	10.8656	9.53107	9.89362	9.45725	12.8248
6.05	7.16983	8.28234	10.8445	9.8026	10.0495	9.701	12.8115
6.06667	7.24754	8.36848	10.846	10.074	9.83637	9.94451	12.7982
6.08333	7.3252	8.45458	10.8934	10.1112	9.56583	10.1878	12.785
6.1	7.40282	8.54065	10.9407	9.99572	9.29554	10.3228	12.7719
6.11667	7.56009	8.48145	10.9881	9.88029	9.0255	10.2385	12.7587
6.13333	7.84455	8.31711	11.0355	9.76493	8.75571	10.1542	12.7456
6.15	8.12885	8.15282	11.0525	9.64964	9.00628	10.07	12.7325
6.16667	8.413	7.9886	10.9857	9.57624	9.35568	9.98589	12.7195
6.18333	8.69698	7.82444	10.9189	9.53317	9.70478	9.93648	12.7065
6.2	8.97855	7.81151	10.8522	9.49013	10.0536	9.98306	12.6936
6.21667	9.25519	7.9409	10.7855	9.44712	10.402	10.0296	12.6806
6.23333	9.53167	8.07025	10.7525	9.40412	10.159	10.0761	12.6677
6.25	9.808	8.19956	10.8539	9.42757	9.7821	10.1226	12.6549
6.26667	10.0842	8.32882	10.9553	9.50317	9.40552	10.1172	12.6421
6.28333	10.273	8.31507	11.0566	9.57872	9.02927	9.89816	12.6293
6.3	10.2069	8.12663	11.1579	9.65423	8.65336	9.67929	12.6165
6.31667	10.1409	7.93826	11.2347	9.7297	8.7994	9.46062	12.6038
6.33333	10.075	7.74996	11.155	9.69108	9.08389	9.24216	12.5911
6.35	10.009	7.56173	11.0752	9.55337	9.36814	9.07137	12.5785
6.36667	10.0156	7.51234	10.9956	9.41575	9.65214	9.21822	12.5659
6.38333	10.3413	7.68	10.916	9.2782	9.93591	9.36494	12.5533
6.4	10.6668	7.84759	10.8464	9.14074	9.81737	9.51153	12.5407
6.41667	10.9922	8.01513	10.9213	9.11035	9.5789	9.65799	12.5282
6.43333	11.3174	8.18261	10.9961	9.18275	9.34065	9.81182	12.5158
6.45	11.5695	8.31259	11.0709	9.25511	9.10261	10.0733	12.5033
6.46667	11.2617	8.36476	11.1456	9.32742	8.86479	10.3346	12.4909
6.48333	10.954	8.41691	11.2203	9.39969	8.9007	10.5956	12.4785
6.5	10.6464	8.46905	11.1246	9.47592	9.03016	10.8564	12.4662
6.51667	10.339	8.52117	11.0281	9.55628	9.15953	11.117	12.4539
6.53333	10.0457	8.48278	10.9316	9.63658	9.28879	10.7739	12.4416
6.55	10.0152	8.18004	10.8352	9.71684	9.41794	10.4311	12.4293
6.56667	9.98475	7.87742	10.7389	9.79706	9.37823	10.0886	12.4171
6.58333	9.9543	7.5749	10.778	9.83671	9.27295	9.74643	12.4049
6.6	9.92388	7.27249	10.8266	9.82974	9.16776	9.40457	12.3928
6.61667	9.89347	7.04644	10.8752	9.82278	9.06267	9.34659	12.3807
6.63333	10.2153	7.15628	10.9238	9.81582	8.95768	9.30837	12.3686
6.65	10.5405	7.26609	10.9723	9.80887	8.87632	9.27019	12.3566
6.66667	10.8655	7.37586	11.026	9.77489	8.8056	9.23205	12.3445
6.68333	11.1903	7.4856	11.0804	9.70652	8.73494	9.19395	12.3326
6.7	11.515	7.58034	11.1347	9.6382	8.66435	9.28588	12.3206
6.71667	11.4651	7.56537	11.189	9.56991	8.59383	9.39716	12.3087
6.73333	11.3849	7.55039	11.2433	9.50167	8.53438	9.50834	12.2968
6.75	11.3048	7.53543	11.1583	9.53231	8.48064	9.61943	12.2849
6.76667	11.2247	7.52047	11.0395	9.6994	8.42696	9.73042	12.2731
6.78333	11.1446	7.50711	10.9208	9.8664	8.37332	9.74933	12.2613
6.8	11.0404	7.52106	10.8022	10.0333	8.31974	9.74595	12.2496
6.81667	10.9322	7.53501	10.6836	10.2001	8.31482	9.74257	12.2378
6.83333	10.824	7.54896	10.6162	10.1602	8.33784	9.73921	12.2261
6.85	10.7159	7.56291	10.5668	9.80385	8.36084	9.73584	12.2145
6.86667	10.6079	7.57685	10.5174	9.44773	8.38383	9.7618	12.2028
6.88333	10.7928	7.70889	10.4681	9.09182	8.40681	9.7983	12.1912
6.9	11.0555	7.84269	10.4188	8.73611	8.45815	9.83477	12.1796
6.91667	11.3181	7.97644	10.4774	8.53795	8.52757	9.87122	12.1681
6.93333	11.5805	8.11015	10.5867	8.60775	8.59695	9.90763	12.1566
6.95	11.8428	8.24381	10.696	8.67751	8.66628	9.84105	12.1451
6.96667	11.7526	8.31141	10.8052	8.74722	8.73555	9.72386	12.1337
6.98333	11.5289	8.37325	10.9144	8.8169	8.77997	9.60676	12.1222
7	11.3053	8.43507	10.9173	8.87232	8.80712	9.48978	12.1109
7.01667	11.0818	8.49687	10.8537	8.90129	8.83425	9.3729	12.0995
7.03333	10.8585	8.55865	10.7902	8.93024	8.86137	9.29839	12.0882
7.05	10.6738	8.40201	10.7267	8.95918	8.88847	9.25097	12.0769
7.06667	10.5094	8.20988	10.6632	8.9881	8.9131	9.20359	12.0656
7.08333	10.3452	8.0178	10.6614	9.02104	8.93583	9.15625	12.0544
7.1	10.181	7.82579	10.7099	9.06213	8.95854	9.10896	12.0431
7.11667	10.017	7.63385	10.7583	9.10321	8.98124	9.12342	12.032
7.13333	10.0546	7.63982	10.8068	9.14426	9.00393	9.18935	12.0208
7.15	10.2295	7.6968	10.8552	9.18528	8.98563	9.25524	12.0097
7.16667	10.4043	7.75376	10.8179	9.16001	8.93245	9.32107	11.9986
7.18333	10.579	7.81071	10.6913	8.98375	8.87932	9.38684	11.9875
7.2	10.7536	7.86764	10.5649	8.8076	8.82624	9.40352	11.9765
7.21667	10.8111	7.87939	10.4385	8.63155	8.7732	9.36599	11.9655
7.23333	10.767	7.87402	10.3122	8.4556	8.68581	9.32851	11.9545
7.25	10.7229	7.86864	10.2728	8.32852	8.56546	9.29105	11.9436
7.26667	10.6788	7.86327	10.3509	8.32689	8.4452	9.25363	11.9327
7.28333	10.6347	7.85791	10.4291	8.32527	8.32504	9.13765	11.9218
7.3	10.5939	7.90908	10.5071	8.32365	8.20499	8.90873	11.9109
7.31667	10.5568	7.99	10.5852	8.32202	8.26285	8.68002	11.9001
7.33333	10.5197	8.0709	10.6278	8.35737	8.51326	8.45149	11.8893
7.35	10.4826	8.15177	10.6061	8.49786	8.76349	8.22317	11.8785
7.36667	10.4455	8.23262	10.5844	8.63828	9.01353	8.16757	11.8678
7.38333	10.4335	8.29946	10.5628	8.77862	9.26338	8.4395	11.857
7.4	10.4599	8.35655	10.5411	8.91888	9.28092	8.7112	11.8464
7.41667	10.4862	8.41363	10.5094	9.00193	9.02601	8.98268	11.8357
7.43333	10.5125	8.4707	10.4521	8.899	8.77131	9.25393	11.8251
7.45	10.5389	8.52774	10.395	8.79613	8.51681	9.41188	11.8145
7.46667	10.5629	8.44772	10.3378	8.69331	8.2625	9.27178	11.8039
7.48333	10.5823	8.24623	10.2807	8.59055	8.21889	9.1318	11.7933
7.5	10.6016	8.04481	10.235	8.54102	8.44313	8.99195	11.7828
7.51667	10.621	7.84345	10.23	8.69148	8.6672	8.85221	11.7723
7.53333	10.6403	7.64216	10.2251	8.84186	8.8911	8.7485	11.7619
7.55	10.6205	7.52321	10.2201	8.99216	9.11484	8.77994	11.7514
7.56667	10.4921	7.49895	10.2151	9.14237	9.20124	8.81137	11.741
7.58333	10.3637	7.4747	10.205	9.25504	9.0943	8.84277	11.7306
7.6	10.2354	7.45046	10.1681	9.208	8.98745	8.87414	11.7203
7.61667	10.1072	7.42624	10.1312	9.16099	8.88068	8.87306	11.71
7.63333	10.0367	7.40193	10.0943	9.114	8.774	8.6883	11.6997
7.65	10.1967	7.37749	10.0574	9.06705	8.64975	8.50369	11.6894
7.66667	10.3566	7.35306	10.0341	9.01761	8.4968	8.31924	11.6791
7.68333	10.5164	7.32865	10.1394	8.9555	8.34397	8.13494	11.6689
7.7	10.6762	7.30424	10.2447	8.89343	8.19125	7.98767	11.6587
7.71667	10.8172	7.30551	10.35	8.8314	8.03865	8.23741	11.6485
7.73333	10.8436	7.35777	10.4551	8.7694	8.00184	8.48695	11.6384
7.75	10.87	7.41001	10.5544	8.71944	8.17983	8.73628	11.6283
7.76667	10.8963	7.46223	10.4642	8.74317	8.35768	8.98542	11.6182
7.78333	10.9227	7.51444	10.3741	8.76689	8.53541	9.2305	11.6081
7.8	10.9333	7.5514	10.284	8.7906	8.71302	9.22285	11.5981
7.81667	10.749	7.54615	10.1939	8.8143	8.8146	9.21522	11.5881
7.83333	10.5648	7.5409	10.1039	8.82771	8.76206	9.20759	11.5781
7.85	10.3808	7.53566	10.1052	8.76585	8.70957	9.19997	11.5681
7.86667	10.1968	7.53041	10.1098	8.70402	8.65712	9.19236	11.5582
7.88333	10.0128	7.53109	10.1144	8.64223	8.60471	9.09328	11.5483
7.9	9.79229	7.55471	10.119	8.58047	8.52697	8.98896	11.5384
7.91667	9.57192	7.57832	10.1236	8.52639	8.39149	8.88472	11.5286
7.93333	9.35167	7.60193	10.1124	8.54513	8.25612	8.78057	11.5188
7.95	9.13154	7.62553	10.0993	8.56386	8.12085	8.6765	11.509
7.96667	8.91153	7.64912	10.0863	8.58259	7.98568	8.73185	11.4992
7.98333	8.77403	7.67266	10.0732	8.60131	7.94509	8.80888	11.4894
8	8.81169	7.69619	10.0602	8.60591	8.14738	8.88585	11.4797
8.01667	8.84932	7.71972	10.0393	8.42315	8.34952	8.96275	11.47
8.03333	8.88693	7.74324	10.0167	8.2405	8.55153	9.0396	11.4603
8.05	8.92453	7.75565	9.9942	8.05794	8.75339	8.8873	11.4507
8.06667	8.9621	7.63111	9.97167	7.87549	8.83936	8.68483	11.441
8.08333	8.99964	7.50661	9.94915	7.7052	8.59594	8.48253	11.4314
8.1	9.03717	7.38214	9.99047	7.76424	8.3527	8.2804	11.4219
8.11667	9.07615	7.25772	10.0519	7.82325	8.10964	8.07842	11.4123
8.13333	9.12411	7.13455	10.1134	7.88222	7.86675	8.08043	11.4028
8.15	9.17204	7.25367	10.1748	7.94117	7.69033	8.15036	11.3933
8.16667	9.21995	7.37276	10.2362	7.99984	7.72977	8.22023	11.3838
8.18333	9.26782	7.4918	10.2735	8.04884	7.7692	8.29005	11.3744
8.2	9.31568	7.61082	10.3006	8.09781	7.8086	8.35981	11.365
8.21667	9.3635	7.72979	10.3276	8.14675	7.84797	8.35692	11.3555
8.23333	9.4113	7.74089	10.3547	8.19567	7.87495	8.32067	11.3462
8.25	9.45907	7.74509	10.3817	8.24457	7.85241	8.28445	11.3368
8.26667	9.50681	7.7493	10.3825	8.208	7.82988	8.24826	11.3275
8.28333	9.55135	7.7535	10.3683	8.17144	7.80738	8.2121	11.3182
8.3	9.55669	7.7577	10.3541	8.13491	7.7849	8.1791	11.3089
8.31667	9.56203	7.65364	10.3399	8.0984	7.77299	8.14801	11.2996
8.33333	9.56736	7.53414	10.3257	8.06191	7.81263	8.11694	11.2904
8.35	9.57269	7.41468	10.2981	7.88298	7.85225	8.0859	11.2812
8.36667	9.57802	7.29526	10.2604	7.70124	7.89184	8.05489	11.272
8.38333	9.58334	7.17587	10.2227	7.5196	7.93141	8.05839	11.2628
8.4	9.58866	7.14091	10.185	7.33805	7.95482	8.08953	11.2537
8.41667	9.59397	7.12639	10.1473	7.15661	7.88683	8.12064	11.2446
8.43333	9.59928	7.11188	10.1426	7.45123	7.81888	8.15173	11.2355
8.45	9.60466	7.09738	10.1709	7.76554	7.75099	8.1828	11.2264
8.46667	9.61711	7.08288	10.1992	8.0797	7.68315	8.29299	11.2174
8.48333	9.62956	7.06475	10.2275	8.39369	7.61535	8.48709	11.2084
8.5	9.64199	7.04531	10.2557	8.70752	7.60211	8.68105	11.1994
8.51667	9.65442	7.02589	10.2571	8.58159	7.64791	8.87486	11.1904
8.53333	9.66684	7.00647	10.2229	8.42517	7.69368	9.06852	11.1814
8.55	9.67925	6.98706	10.1887	8.26884	7.73942	9.06916	11.1725
8.56667	9.69166	7.01235	10.1546	8.1126	7.78514	8.80361	11.1636
8.58333	9.70406	7.05965	10.1204	7.95643	7.83083	8.53827	11.1547
8.6	9.71645	7.10693	10.0907	8.08252	7.87649	8.27313	11.1459
8.61667	9.72883	7.1542	10.0683	8.23643	7.92212	8.00821	11.137
8.63333	9.58033	7.20146	10.046	8.39027	7.94794	7.88746	11.1282
8.65	9.42254	7.19687	10.0236	8.54402	7.92864	8.02833	11.1194
8.66667	9.26483	7.15844	10.0013	8.6977	7.90936	8.1691	11.1106
8.68333	9.10722	7.12003	9.94381	8.58881	7.8901	8.30975	11.1019
8.7	8.94969	7.08163	9.80622	8.44754	7.87085	8.4503	11.0932
8.71667	8.79224	7.04325	9.66868	8.30635	7.85162	8.53968	11.0845
8.73333	8.63488	7.05379	9.53121	8.16524	7.83241	8.50407	11.0758
8.75	8.47761	7.10599	9.39381	8.02419	7.81321	8.46848	11.0671
8.76667	8.32043	7.15817	9.33376	7.80972	7.79403	8.43293	11.0585
8.78333	8.16333	7.21034	9.51851	7.58388	7.77487	8.3974	11.0499
8.8	8.22954	7.26249	9.70317	7.35817	7.75136	8.3235	11.0413
8.81667	8.32615	7.28716	9.88776	7.13257	7.71669	8.12115	11.0327
8.83333	8.42271	7.28206	10.0723	6.90708	7.68203	7.91895	11.0242
8.85	8.51921	7.27697	10.2137	7.12592	7.64741	7.7169	11.0156
8.86667	8.61565	7.27188	10.1528	7.42925	7.61281	7.51502	11.0071
8.88333	8.71204	7.26679	10.0919	7.73243	7.57824	7.34936	10.9987
8.9	8.80838	7.23006	10.031	8.03546	7.54369	7.36628	10.9902
8.91667	8.90467	7.14874	9.97011	8.33833	7.50917	7.38319	10.9818
8.93333	9.0009	7.06745	9.90322	8.25103	7.47467	7.40009	10.9733
8.95	9.09708	6.98618	9.78475	8.07527	7.4402	7.41697	10.9649
8.96667	9.21218	6.90493	9.66634	7.89959	7.42067	7.43837	10.9566
8.98333	9.33139	6.89765	9.54797	7.724	7.44473	7.50279	10.9482
9	9.45053	7.03076	9.42966	7.54851	7.46878	7.56717	10.9399
9.01667	9.5696	7.16383	9.31926	7.47137	7.49282	7.63149	10.9316
9.03333	9.68861	7.29686	9.42525	7.42039	7.51684	7.69578	10.9233
9.05	9.80755	7.42985	9.5312	7.36943	7.54085	7.75693	10.915
9.06667	9.92643	7.48944	9.63711	7.3185	7.56485	7.69785	10.9068
9.08333	10.0452	7.35564	9.74298	7.26759	7.58884	7.63883	10.8985
9.1	10.164	7.22187	9.8488	7.46591	7.61282	7.57985	10.8903
9.11667	10.2827	7.08814	9.75767	7.73855	7.63678	7.52092	10.8822
9.13333	10.2286	6.95445	9.66152	8.01105	7.65088	7.46203	10.874
9.15	10.1185	6.85871	9.56542	8.28342	7.63291	7.52142	10.8659
9.16667	10.0085	6.90141	9.46936	8.55565	7.61496	7.5857	10.8577
9.18333	9.89858	6.94409	9.37334	8.43525	7.59702	7.64992	10.8496
9.2	9.78871	6.98677	9.40075	8.18059	7.5791	7.7141	10.8415
9.21667	9.67889	7.02943	9.43961	7.92606	7.56119	7.77824	10.8335
9.23333	9.56913	7.04477	9.47845	7.67166	7.5433	7.88487	10.8255
9.25	9.45943	6.91126	9.51728	7.41739	7.52542	7.99615	10.8174
9.26667	9.34979	6.7778	9.55609	7.34066	7.50755	8.10734	10.8094
9.28333	9.24021	6.64438	9.54738	7.33469	7.4897	8.21846	10.8015
9.3	9.18553	6.511	9.52995	7.32872	7.47295	8.32949	10.7935
9.31667	9.15608	6.40027	9.51253	7.32276	7.46015	8.19232	10.7856
9.33333	9.12665	6.53308	9.49513	7.3168	7.44736	8.00622	10.7776
9.35	9.09723	6.66585	9.47773	7.41642	7.43459	7.82027	10.7697
9.36667	9.06783	6.79858	9.46038	7.56454	7.42182	7.63445	10.7619
9.38333	9.03845	6.93128	9.44306	7.71259	7.40907	7.44877	10.754
9.4	9.00908	7.06102	9.42575	7.86056	7.39633	7.45055	10.7462
9.41667	8.97973	6.99891	9.40844	8.00847	7.3836	7.50984	10.7384
9.43333	8.95039	6.93682	9.39114	7.99386	7.37088	7.56909	10.7305
9.45	8.92106	6.87474	9.43912	7.89561	7.35817	7.62829	10.7228
9.46667	8.99101	6.81269	9.5131	7.79741	7.33644	7.68746	10.715
9.48333	9.12173	6.75065	9.58705	7.69926	7.27364	7.76834	10.7073
9.5	9.25238	6.76098	9.66097	7.60116	7.21088	7.85848	10.6995
9.51667	9.38295	6.77512	9.73486	7.50351	7.14816	7.94857	10.6919
9.53333	9.51345	6.78925	9.76695	7.48601	7.08548	8.03858	10.6842
9.55	9.64388	6.80338	9.77655	7.46852	7.02284	8.12853	10.6765
9.56667	9.77423	6.81751	9.78614	7.45104	6.96024	8.21626	10.6689
9.58333	9.90451	6.87778	9.79573	7.43357	6.89768	8.1623	10.6612
9.6	10.0347	6.94403	9.80532	7.41611	6.83517	8.10838	10.6536
9.61667	10.1649	7.01026	9.80284	7.39866	6.77269	8.0545	10.646
9.63333	10.2015	7.07647	9.7918	7.38122	6.72003	8.00067	10.6385
9.65	10.1634	7.14266	9.78077	7.36379	6.72066	7.94687	10.6309
9.66667	10.1252	6.99465	9.76975	7.34637	6.7213	7.89311	10.6234
9.68333	10.0871	6.79965	9.75872	7.32896	6.72194	7.8394	10.6159
9.7	10.0489	6.60471	9.74771	7.31157	6.72258	7.78572	10.6084
9.71667	10.0108	6.40982	9.7367	7.29418	6.72323	7.75729	10.6009
9.73333	9.97276	6.21499	9.7257	7.2768	6.72387	7.73422	10.5935
9.75	9.9347	6.18741	9.71471	7.25943	6.72452	7.71117	10.586
9.76667	9.89666	6.21557	9.70372	7.24208	6.72517	7.68813	10.5786
9.78333	9.85864	6.24371	9.69274	7.22473	6.72583	7.66512	10.5712
9.8	9.86294	6.27185	9.68176	7.20739	6.72648	7.64212	10.5639
9.81667	9.91126	6.29999	9.67079	7.19007	6.72714	7.61914	10.5565
9.83333	9.95954	6.3219	9.65983	7.17275	6.7278	7.59618	10.5492
9.85	10.0078	6.34096	9.64887	7.15544	6.72846	7.57323	10.5418
9.86667	10.056	6.36001	9.63792	7.13815	6.72913	7.55031	10.5345
9.88333	10.1042	6.37906	9.62697	7.12086	6.72979	7.5274	10.5273
9.9	10.1524	6.3981	9.61603	7.10358	6.73046	7.50451	10.52
9.91667	10.2005	6.41713	9.6051	7.08632	6.73113	7.48164	10.5127
9.93333	10.2487	6.43617	9.59418	7.06906	6.7318	7.45879	10.5055
9.95	10.2968	6.45519	9.58325	7.05181	6.73248	7.43595	10.4983
9.96667	10.3448	6.47422	9.57234	7.03471	6.73315	7.41313	10.4911
9.98333	10.3929	6.49323	9.56143	7.01762	6.73382	7.39033	10.4839
10	10.4409	6.51225	9.55053	7.00053	6.73448	7.36754	10.4768
10.0167	10.4889	6.53152	9.53963	6.98346	6.73514	7.34478	10.4696
10.0333	10.5377	6.55105	9.52874	6.96639	6.73581	7.32284	10.4625
10.05	10.5873	6.57058	9.51822	6.94934	6.73648	7.30092	10.4554
10.0667	10.6369	6.59011	9.50807	6.93229	6.73079	7.27901	10.4483
10.0833	10.6865	6.60964	9.49792	6.91525	6.70794	7.25712	10.4412
10.1	10.7361	6.62916	9.48777	6.89822	6.6851	7.23524	10.4342
10.1167	10.7857	6.64868	9.47763	6.8812	6.66227	7.21336	10.4271
10.1333	10.8353	6.6515	9.46749	6.86419	6.63946	7.19151	10.4201
10.15	10.722	6.6233	9.45736	6.84719	6.61667	7.16966	10.4131
10.1667	10.556	6.59511	9.44706	6.83987	6.59389	7.14783	10.4067
10.1833	10.3899	6.56692	9.43527	6.84001	6.57113	7.12601	10.4003
10.2	10.224	6.53873	9.42348	6.84014	6.54838	7.1042	10.3939
10.2167	10.058	6.51054	9.4117	6.84028	6.52565	7.08913	10.3876
10.2333	9.89215	6.48236	9.39993	6.84042	6.50294	7.07802	10.3812
10.25	9.72629	6.45418	9.38816	6.84056	6.48024	7.06692	10.3749
10.2667	9.56047	6.42601	9.37639	6.8407	6.45755	7.05582	10.3686
10.2833	9.3947	6.39784	9.36463	6.84085	6.43488	7.04473	10.3623
10.3	9.22896	6.36968	9.35288	6.84099	6.41223	7.03364	10.356
10.3167	9.06325	6.34152	9.34112	6.84114	6.38959	7.02257	10.3498
10.3333	8.89759	6.31336	9.32938	6.84129	6.36697	7.0115	10.3435
10.35	8.73197	6.2852	9.31763	6.84144	6.34436	7.00044	10.3373
10.3667	8.56638	6.25705	9.30589	6.8416	6.32176	6.98938	10.331
10.3833	8.40084	6.22891	9.29416	6.84175	6.29918	6.97833	10.3248
10.4	8.23533	6.20077	9.28243	6.84191	6.27662	6.96729	10.3187
10.4167	8.06986	6.17263	9.27071	6.84207	6.25407	6.95626	10.3125
10.4333	7.90443	6.14449	9.25899	6.84223	6.23154	6.94523	10.3064
10.45	7.73904	6.11636	9.24727	6.84239	6.20902	6.93421	10.3002
10.4667	7.57368	6.08823	9.23556	6.84256	6.18651	6.92319	10.2941
10.4833	7.41334	6.08505	9.22385	6.84272	6.16402	6.91219	10.288
10.5	7.4963	6.10582	9.21215	6.84289	6.16182	6.90119	10.2819
10.5167	7.57924	6.12659	9.20045	6.84306	6.19201	6.89019	10.2758
10.5333	7.66216	6.14736	9.18876	6.84323	6.22218	6.87921	10.2698
10.55	7.74506	6.16812	9.17707	6.84341	6.25234	6.86823	10.2637
10.5667	7.82794	6.18889	9.16539	6.84358	6.28248	6.85725	10.2577
10.5833	7.9108	6.20965	9.15371	6.84376	6.31261	6.84629	10.2517
10.6	7.99365	6.23041	9.14203	6.84394	6.34272	6.83533	10.2457
10.6167	8.07647	6.25117	9.13036	6.84412	6.37282	6.82438	10.2397
10.6333	8.15928	6.27193	9.11869	6.8443	6.4029	6.81343	10.2338
10.65	8.24206	6.27021	9.10703	6.84449	6.43297	6.80249	10.2278
10.6667	8.3018	6.24046	9.09537	6.84468	6.45037	6.79156	10.2219
10.6833	8.36056	6.21071	9.08372	6.84486	6.44528	6.78063	10.216
10.7	8.41931	6.18096	9.07207	6.84505	6.44019	6.76971	10.2101
10.7167	8.47804	6.15121	9.06042	6.84525	6.4351	6.77043	10.2042
10.7333	8.53676	6.12147	9.04878	6.84544	6.43002	6.78596	10.1983
10.75	8.59547	6.09174	9.03714	6.84563	6.42494	6.80149	10.1925
10.7667	8.65417	6.062	9.02717	6.84583	6.41987	6.81701	10.1866
10.7833	8.71285	6.03228	9.02827	6.84603	6.4148	6.83253	10.1808
10.8	8.77151	6.00255	9.02938	6.84623	6.40974	6.84804	10.175
10.8167	8.83017	5.99704	9.03048	6.84644	6.40468	6.86354	10.1692
10.8333	8.82851	6.03103	9.03159	6.8414	6.39535	6.87904	10.1634
10.85	8.81979	6.06501	9.0327	6.82104	6.37714	6.89453	10.1577
10.8667	8.81106	6.09899	9.03381	6.8007	6.35894	6.91002	10.1519
10.8833	8.80234	6.13297	9.03492	6.78037	6.34075	6.92723	10.1462
10.9	8.79362	6.16694	9.03604	6.76004	6.32257	6.94733	10.1405
10.9167	8.7849	6.20092	9.03715	6.73973	6.3044	6.96742	10.1348
10.9333	8.77619	6.23488	9.03677	6.71943	6.28625	6.9875	10.1291
10.95	8.76748	6.26885	9.0165	6.69914	6.26811	7.00757	10.1234
10.9667	8.75876	6.30281	8.99623	6.67885	6.24998	7.02764	10.1177
10.9833	8.75006	6.3368	8.97596	6.65858	6.23186	7.0477	10.1121
11	8.72987	6.37086	8.95571	6.64379	6.21345	7.06775	10.1064
11.0167	8.70733	6.40491	8.93545	6.64681	6.19435	7.08779	10.1008
11.0333	8.6848	6.43895	8.91521	6.64984	6.17525	7.10782	10.0952
11.05	8.66227	6.47299	8.89497	6.65287	6.15617	7.12099	10.0896
11.0667	8.63975	6.50703	8.87473	6.6559	6.13711	7.11891	10.0841
11.0833	8.61723	6.54107	8.85451	6.65893	6.11805	7.11684	10.0785
11.1	8.59472	6.57511	8.8343	6.66196	6.09901	7.11476	10.073
11.1167	8.57222	6.60914	8.8176	6.66499	6.07998	7.11269	10.0674
11.1333	8.54972	6.64317	8.8009	6.66802	6.06096	7.11062	10.0619
11.15	8.52722	6.65879	8.78421	6.67105	6.04195	7.10856	10.0564
11.1667	8.56817	6.62066	8.76752	6.66855	6.0324	7.10649	10.0509
11.1833	8.62858	6.58253	8.75083	6.64587	6.04654	7.10443	10.0455
11.2	8.68899	6.5444	8.73416	6.62319	6.06068	7.10237	10.04
11.2167	8.74938	6.50628	8.71748	6.60053	6.07481	7.10262	10.0345
11.2333	8.80976	6.46817	8.70081	6.57787	6.08894	7.10998	10.0291
11.25	8.87012	6.43005	8.68415	6.55522	6.10306	7.11734	10.0237
11.2667	8.93047	6.39195	8.66749	6.53259	6.11718	7.1247	10.0183
11.2833	8.9908	6.35384	8.69401	6.50996	6.13129	7.13206	10.0129
11.3	9.05113	6.31574	8.72328	6.48735	6.14539	7.13941	10.0075
11.3167	9.11143	6.28403	8.75255	6.46475	6.15949	7.14676	10.0022
11.3333	9.11617	6.2795	8.78181	6.45243	6.18087	7.15411	9.99681
11.35	9.09708	6.27498	8.81107	6.4839	6.22297	7.16146	9.99148
11.3667	9.078	6.27046	8.84032	6.51535	6.26505	7.16881	9.98616
11.3833	9.05892	6.26594	8.86957	6.5468	6.30711	7.16438	9.98085
11.4	9.03985	6.26143	8.89882	6.57824	6.34916	7.10635	9.97556
11.4167	9.02079	6.25691	8.92806	6.60967	6.39118	7.04834	9.97028
11.4333	9.00172	6.25239	8.95729	6.64109	6.43318	6.99036	9.96502
11.45	8.98267	6.24788	8.96326	6.6725	6.47516	6.93241	9.95976
11.4667	8.96361	6.24336	8.96591	6.7039	6.51712	6.87449	9.95453
11.4833	8.94456	6.23208	8.96856	6.73529	6.55907	6.81659	9.9493
11.5	8.9166	6.17342	8.97121	6.75876	6.57751	6.75872	9.94409
11.5167	8.88363	6.11477	8.97387	6.74216	6.5195	6.70088	9.93889
11.5333	8.85066	6.05612	8.97652	6.72558	6.46153	6.64307	9.93371
11.55	8.81771	5.99748	8.97918	6.709	6.40359	6.58919	9.92853
11.5667	8.78475	5.93884	8.98183	6.69243	6.34568	6.56395	9.92338
11.5833	8.75181	5.88021	8.98449	6.67587	6.2878	6.53872	9.91823
11.6	8.71888	5.82159	8.98714	6.65932	6.22996	6.51351	9.9131
11.6167	8.68595	5.76297	8.99194	6.64277	6.17214	6.48831	9.90798
11.6333	8.65303	5.70436	8.99724	6.62623	6.11436	6.46312	9.90288
11.65	8.62012	5.65205	9.00253	6.6097	6.05661	6.43795	9.89779
11.6667	8.57138	5.69815	9.00783	6.59336	6.01094	6.41278	9.8927
11.6833	8.51094	5.74425	9.01313	6.57819	6.01205	6.38763	9.88764
11.7	8.45052	5.79034	9.01843	6.56302	6.01316	6.36249	9.88259
11.7167	8.39011	5.83644	9.02373	6.54785	6.01428	6.33942	9.87755
11.7333	8.32971	5.88252	9.02903	6.5327	6.01539	6.35151	9.87252
11.75	8.26933	5.92861	9.03433	6.51755	6.01651	6.3636	9.86751
11.7667	8.20896	5.97469	9.03963	6.50241	6.01762	6.37568	9.8625
11.7833	8.14861	6.02076	9.01416	6.48728	6.01874	6.38776	9.85752
11.8	8.08827	6.06683	8.97817	6.47215	6.01986	6.39983	9.85254
11.8167	8.02794	6.1129	8.94219	6.45703	6.02098	6.4119	9.84758
11.8333	8.01594	6.14827	8.90622	6.44685	6.02615	6.42397	9.84263
11.85	8.05036	6.18359	8.87026	6.4746	6.04919	6.43603	9.83769
11.8667	8.08477	6.2189	8.83431	6.50234	6.07222	6.44809	9.83277
11.8833	8.11918	6.25421	8.79836	6.53007	6.09523	6.46014	9.82785
11.9	8.15358	6.28951	8.76243	6.5578	6.11824	6.46988	9.82296
11.9167	8.18797	6.32481	8.7265	6.58551	6.14123	6.47959	9.81807
11.9333	8.22235	6.36011	8.69058	6.61322	6.16422	6.4893	9.81319
11.95	8.25673	6.39541	8.67673	6.64092	6.1872	6.49901	9.80833
11.9667	8.29109	6.4307	8.67326	6.66862	6.21016	6.50871	9.80348
11.9833	8.32546	6.46599	8.66979	6.6963	6.23312	6.51841	9.79865
12	8.33757	6.44342	8.66632	6.72068	6.24621	6.52811	9.79382
12.0167	8.32196	6.41616	8.66286	6.71163	6.20754	6.5378	9.78901
12.0333	8.30634	6.3889	8.6594	6.7026	6.16889	6.54749	9.78421
12.05	8.29073	6.36164	8.65594	6.69356	6.13026	6.55718	9.77942
12.0667	8.27513	6.33439	8.65248	6.68454	6.09165	6.59367	9.77465
12.0833	8.25953	6.30714	8.64902	6.67552	6.05307	6.63232	9.76988
12.1	8.24393	6.27989	8.64557	6.6665	6.0145	6.67095	9.76513
12.1167	8.22833	6.25264	8.66482	6.65749	5.97595	6.70957	9.7604
12.1333	8.21274	6.2254	8.69799	6.64848	5.93743	6.74817	9.75567
12.15	8.19716	6.19816	8.73115	6.63947	5.89892	6.78675	9.75095
12.1667	8.2019	6.14909	8.7643	6.63055	5.86875	6.82532	9.74625
12.1833	8.23982	6.09631	8.79745	6.62267	5.89185	6.86388	9.74156
12.2	8.27772	6.04354	8.8306	6.6148	5.91493	6.90241	9.73688
12.2167	8.31562	5.99078	8.86374	6.60694	5.93801	6.94093	9.73222
12.2333	8.3535	5.93802	8.89688	6.59907	5.96107	6.90921	9.72756
12.25	8.39138	5.88526	8.93001	6.59121	5.98413	6.86559	9.72292
12.2667	8.42925	5.83251	8.96313	6.58336	6.00717	6.822	9.71829
12.2833	8.46711	5.77977	8.95905	6.57551	6.03021	6.77842	9.71367
12.3	8.50497	5.72703	8.92514	6.56767	6.05324	6.73486	9.70906
12.3167	8.54281	5.6743	8.89124	6.55982	6.07625	6.69132	9.70447
12.3333	8.52244	5.68162	8.85735	6.55094	6.09915	6.6478	9.69989
12.35	8.37552	5.70491	8.82347	6.51986	6.12113	6.6043	9.69532
12.3667	8.22862	5.7282	8.7896	6.48878	6.14311	6.56082	9.69075
12.3833	8.08176	5.75148	8.75573	6.45772	6.16508	6.51736	9.68621
12.4	7.93494	5.77477	8.72187	6.42667	6.18704	6.5168	9.68167
12.4167	7.78814	5.79805	8.68802	6.39564	6.20898	6.52763	9.67715
12.4333	7.64138	5.82133	8.65418	6.36461	6.23093	6.53847	9.67263
12.45	7.49465	5.84461	8.6417	6.3336	6.25286	6.54929	9.66813
12.4667	7.34795	5.86789	8.65147	6.3026	6.27478	6.56012	9.66364
12.4833	7.20129	5.89116	8.66123	6.27162	6.29669	6.57094	9.65916
12.5	7.12112	5.91097	8.67099	6.24064	6.31346	6.58176	9.65469
12.5167	7.2403	5.92949	8.68075	6.20955	6.27493	6.59257	9.65024
12.5333	7.35945	5.94801	8.69052	6.17847	6.23641	6.60338	9.64579
12.55	7.47858	5.96653	8.70028	6.1474	6.19791	6.61419	9.64136
12.5667	7.59768	5.98505	8.71004	6.11635	6.15943	6.59889	9.63694
12.5833	7.71675	6.00357	8.7198	6.08531	6.12097	6.57394	9.63253
12.6	7.8358	6.02208	8.72955	6.05427	6.08253	6.549	9.62813
12.6167	7.95482	6.0406	8.73658	6.02326	6.04411	6.52408	9.62374
12.6333	8.07382	6.05911	8.73992	5.99225	6.00571	6.49917	9.61936
12.65	8.19278	6.07763	8.74325	5.96125	5.96733	6.47427	9.615
12.6667	8.27693	6.1002	8.74658	5.93027	5.93289	6.44938	9.61064
12.6833	8.20777	6.12477	8.74992	5.99037	5.95987	6.4245	9.6063
12.7	8.13862	6.14934	8.75325	6.05137	5.98683	6.39963	9.60197
12.7167	8.06949	6.17391	8.75659	6.11235	6.01378	6.37478	9.59764
12.7333	8.00038	6.19847	8.75992	6.17331	6.04072	6.39669	9.59333
12.75	7.93128	6.22304	8.76326	6.23426	6.06764	6.44214	9.58903
12.7667	7.8622	6.2476	8.7666	6.29518	6.09456	6.48757	9.58475
12.7833	7.79313	6.27216	8.76592	6.35609	6.12147	6.53298	9.58047
12.8	7.72408	6.29672	8.7581	6.41698	6.14836	6.57838	9.5762
12.8167	7.65504	6.32128	8.75029	6.47785	6.17525	6.62375	9.57195
12.8333	7.60031	6.29384	8.74247	6.5387	6.20091	6.66911	9.5677
12.85	7.6504	6.23245	8.73467	6.54164	6.19323	6.71445	9.56347
12.8667	7.70047	6.17107	8.72686	6.54247	6.18555	6.75977	9.55925
12.8833	7.75053	6.1097	8.71905	6.5433	6.17788	6.80508	9.55503
12.9	7.80057	6.04833	8.71125	6.54414	6.17022	6.81657	9.55083
12.9167	7.85061	5.98696	8.70345	6.54498	6.16256	6.80552	9.54664
12.9333	7.90064	5.9256	8.69565	6.54581	6.1549	6.79447	9.54246
12.95	7.95065	5.86425	8.69191	6.54665	6.14725	6.78343	9.53829
12.9667	8.00066	5.8029	8.69761	6.5475	6.13961	6.7724	9.53413
12.9833	8.05065	5.74156	8.70332	6.54834	6.13196	6.76138	9.52998
13	8.09614	5.7103	8.70902	6.54918	6.12422	6.75035	9.52584
13.0167	8.06459	5.70465	8.71473	6.5121	6.09378	6.73934	9.52172
13.0333	8.03305	5.69901	8.72043	6.47261	6.06336	6.72833	9.5176
13.05	8.00151	5.69337	8.72614	6.43314	6.03296	6.71732	9.51349
13.0667	7.96999	5.68773	8.73184	6.39368	6.00258	6.69642	9.5094
13.0833	7.93846	5.68209	8.73755	6.35424	5.9722	6.66694	9.50531
13.1	7.90695	5.67645	8.74325	6.31481	5.94185	6.63747	9.50124
13.1167	7.87544	5.67081	8.74648	6.27539	5.9115	6.60801	9.49717
13.1333	7.84394	5.66517	8.74164	6.23599	5.88118	6.57856	9.49312
13.15	7.81245	5.65953	8.73681	6.1966	5.85087	6.54913	9.48907
13.1667	7.78096	5.6812	8.73198	6.15722	5.82057	6.51971	9.48504
13.1833	7.74948	5.73245	8.72714	6.16588	5.8212	6.49031	9.48101
13.2	7.71801	5.78369	8.72231	6.179	5.82247	6.46091	9.477
13.2167	7.68654	5.83493	8.71749	6.19212	5.82373	6.43153	9.473
13.2333	7.65508	5.88617	8.71266	6.20523	5.825	6.41731	9.469
13.25	7.62363	5.9374	8.70784	6.21834	5.82627	6.42017	9.46502
13.2667	7.59219	5.98863	8.70302	6.23145	5.82753	6.42303	9.46105
13.2833	7.56075	6.03985	8.6993	6.24455	5.8288	6.42589	9.45708
13.3	7.52932	6.09107	8.70121	6.25765	5.83007	6.42875	9.45313
13.3167	7.4979	6.14229	8.70311	6.27075	5.83134	6.43161	9.44919
13.3333	7.46648	6.14923	8.70501	6.28385	5.83261	6.43447	9.44526
13.35	7.4652	6.09378	8.70691	6.21141	5.84715	6.43733	9.44133
13.3667	7.46422	6.03834	8.70882	6.12788	5.86224	6.44019	9.43742
13.3833	7.46324	5.98289	8.71072	6.04438	5.87732	6.44305	9.43352
13.4	7.46226	5.92746	8.71263	5.9609	5.8924	6.43455	9.42963
13.4167	7.46128	5.87202	8.71453	5.87746	5.90747	6.40973	9.42574
13.4333	7.4603	5.8166	8.71644	5.79403	5.92253	6.38492	9.42187
13.45	7.45932	5.76117	8.71225	5.71064	5.93759	6.36013	9.418
13.4667	7.45834	5.70575	8.65316	5.62727	5.95265	6.33534	9.41415
13.4833	7.45737	5.65034	8.59408	5.54393	5.9677	6.31056	9.41031
13.5	7.45639	5.63063	8.53501	5.46062	5.98274	6.2858	9.40647
13.5167	7.45541	5.67722	8.47595	5.50945	5.95886	6.26104	9.40265
13.5333	7.45443	5.7238	8.4169	5.57889	5.93205	6.2363	9.39883
13.55	7.45346	5.77039	8.35787	5.64831	5.90526	6.21156	9.39503
13.5667	7.45248	5.81697	8.29884	5.7177	5.87849	6.18326	9.39124
13.5833	7.45151	5.86354	8.23983	5.78708	5.85172	6.14816	9.38745
13.6	7.45053	5.91012	8.18083	5.85644	5.82497	6.11308	9.38367
13.6167	7.44956	5.95668	8.12504	5.92578	5.79824	6.07802	9.37991
13.6333	7.44858	6.00325	8.15746	5.99509	5.77151	6.04297	9.37615
13.65	7.44761	6.04981	8.18989	6.06439	5.7448	6.00793	9.3724
13.6667	7.44663	6.06521	8.22231	6.13367	5.7181	5.97291	9.36866
13.6833	7.44566	6.00244	8.25472	6.09977	5.69142	5.9379	9.36494
13.7	7.44469	5.93967	8.28713	6.04695	5.66474	5.90291	9.36121
13.7167	7.44371	5.8769	8.31954	5.99415	5.63808	5.86793	9.3575
13.7333	7.44274	5.81415	8.35193	5.94136	5.61143	5.85805	9.35381
13.75	7.44177	5.75139	8.38433	5.8886	5.5848	5.91264	9.35011
13.7667	7.44079	5.68865	8.41672	5.83585	5.55818	5.9672	9.34643
13.7833	7.43982	5.6259	8.44911	5.78311	5.53157	6.02175	9.34276
13.8	7.43885	5.56317	8.43459	5.7304	5.50497	6.07627	9.3391
13.8167	7.43788	5.50043	8.41862	5.6777	5.47839	6.13077	9.33544
13.8333	7.43691	5.45371	8.40265	5.62501	5.45181	6.18526	9.3318
13.85	7.44381	5.46374	8.38669	5.6154	5.46317	6.23972	9.32816
13.8667	7.45131	5.47376	8.37073	5.61524	5.47896	6.29416	9.32454
13.8833	7.45881	5.48379	8.35478	5.61507	5.49475	6.34858	9.32092
13.9	7.4663	5.49381	8.33883	5.61491	5.51053	6.39264	9.31731
13.9167	7.47379	5.50384	8.32288	5.61476	5.5263	6.39892	9.31371
13.9333	7.48129	5.51386	8.30694	5.6146	5.54207	6.40521	9.31012
13.95	7.48877	5.52389	8.291	5.61444	5.55784	6.41149	9.30654
13.9667	7.49626	5.53391	8.31158	5.61429	5.5736	6.41777	9.30297
13.9833	7.50375	5.54393	8.33553	5.61413	5.58935	6.42405	9.29941
14	7.51123	5.55152	8.35949	5.61398	5.6051	6.43033	9.29586
14.0167	7.51872	5.54581	8.38345	5.65553	5.62084	6.4366	9.29231
14.0333	7.5262	5.5401	8.4074	5.70782	5.63657	6.44288	9.28878
14.05	7.53368	5.53439	8.43135	5.76009	5.65231	6.44915	9.28525
14.0667	7.54116	5.52868	8.45529	5.81235	5.66803	6.45406	9.28173
14.0833	7.54864	5.52298	8.47923	5.8646	5.68375	6.45124	9.27822
14.1	7.55611	5.51727	8.50317	5.91683	5.69947	6.44843	9.27472
14.1167	7.56359	5.51156	8.52711	5.96905	5.71517	6.44562	9.27123
14.1333	7.57106	5.50586	8.53702	6.02125	5.73088	6.44281	9.26775
14.15	7.57853	5.50016	8.54455	6.07345	5.74658	6.44	9.26428
14.1667	7.586	5.49511	8.55209	6.12562	5.76227	6.43719	9.26081
14.1833	7.59347	5.49678	8.55962	6.14376	5.77796	6.43439	9.25736
14.2	7.60093	5.49845	8.56715	6.15201	5.79364	6.43159	9.25391
14.2167	7.6084	5.50011	8.57468	6.16027	5.80931	6.42879	9.25047
14.2333	7.61586	5.50178	8.58222	6.16852	5.82498	6.42491	9.24704
14.25	7.62332	5.50345	8.58975	6.17677	5.84065	6.40945	9.24362
14.2667	7.63079	5.50511	8.59728	6.18502	5.85631	6.39398	9.24021
14.2833	7.63824	5.50678	8.60481	6.19327	5.87196	6.37853	9.2368
14.3	7.6457	5.50845	8.57779	6.20151	5.88761	6.36308	9.23341
14.3167	7.65316	5.51011	8.54159	6.20976	5.90325	6.34764	9.23002
14.3333	7.66061	5.51093	8.5054	6.21801	5.91889	6.3322	9.22664
14.35	7.64881	5.4784	8.46921	6.17696	5.90772	6.31677	9.22327
14.3667	7.63413	5.44588	8.43304	6.11949	5.89273	6.30135	9.21991
14.3833	7.61946	5.41337	8.39687	6.06204	5.87775	6.28594	9.21656
14.4	7.60479	5.38085	8.3607	6.00461	5.86277	6.27053	9.21321
14.4167	7.59012	5.34834	8.32454	5.94719	5.8478	6.25502	9.20988
14.4333	7.57546	5.31583	8.28839	5.88979	5.83284	6.23953	9.20655
14.45	7.5608	5.28333	8.25225	5.83241	5.81789	6.22404	9.20323
14.4667	7.54615	5.25082	8.25119	5.77504	5.80294	6.20855	9.19992
14.4833	7.53149	5.21832	8.26345	5.7177	5.788	6.19307	9.19662
14.5	7.51684	5.18582	8.2757	5.66037	5.77307	6.1776	9.19332
14.5167	7.5022	5.21991	8.28795	5.64084	5.75814	6.16214	9.19004
14.5333	7.48755	5.25678	8.30021	5.63639	5.74323	6.14668	9.18676
14.55	7.47291	5.29364	8.31246	5.63194	5.72831	6.13123	9.18349
14.5667	7.45828	5.3305	8.32471	5.62749	5.71341	6.11578	9.18023
14.5833	7.44364	5.36736	8.33695	5.62304	5.69851	6.11004	9.17697
14.6	7.42901	5.40422	8.3492	5.61859	5.68362	6.10475	9.17373
14.6167	7.41438	5.44107	8.36145	5.61415	5.66874	6.09946	9.17049
14.6333	7.39976	5.47792	8.36362	5.60971	5.65387	6.09418	9.16726
14.65	7.38514	5.51477	8.3606	5.60527	5.639	6.0889	9.16404
14.6667	7.37052	5.55161	8.35759	5.60083	5.62414	6.08362	9.16083
14.6833	7.35591	5.57658	8.35458	5.5964	5.60928	6.07834	9.15763
14.7	7.3413	5.60022	8.35156	5.59197	5.59444	6.07307	9.15443
14.7167	7.32669	5.62386	8.34855	5.58754	5.5796	6.0678	9.15124
14.7333	7.31209	5.6475	8.34554	5.58311	5.56477	6.06253	9.14806
14.75	7.29749	5.67113	8.34253	5.57869	5.54994	6.05727	9.14489
14.7667	7.28289	5.69477	8.33953	5.57427	5.53512	6.05201	9.14172
14.7833	7.26829	5.7184	8.33652	5.56985	5.52031	6.04675	9.13857
14.8	7.2537	5.74204	8.33248	5.56543	5.50551	6.04149	9.13542
14.8167	7.23911	5.76567	8.32773	5.56101	5.49071	6.03624	9.13228
14.8333	7.22453	5.7893	8.32298	5.5566	5.47592	6.03098	9.12915
14.85	7.21651	5.73749	8.31823	5.55705	5.47025	6.02573	9.12602
14.8667	7.21009	5.67077	8.31349	5.55963	5.46613	6.02049	9.12291
14.8833	7.20367	5.60406	8.30874	5.56222	5.46201	6.01524	9.11979
14.9	7.19725	5.53736	8.304	5.5648	5.4579	6.01	9.11669
14.9167	7.19083	5.47066	8.29926	5.56738	5.45379	6.00887	9.1136
14.9333	7.18442	5.40396	8.29452	5.56997	5.44968	6.00825	9.11051
14.95	7.178	5.33727	8.28978	5.57255	5.44557	6.00763	9.10744
14.9667	7.17159	5.27059	8.28909	5.57514	5.44147	6.00701	9.10437
14.9833	7.16517	5.20391	8.29197	5.57772	5.43737	6.00639	9.1013
15	7.15876	5.13723	8.29485	5.58031	5.43327	6.00577	9.09825
15.0167	7.15235	5.16013	8.29774	5.5829	5.42917	6.00515	9.0952
15.0333	7.14595	5.21053	8.30062	5.58548	5.42508	6.00454	9.09216
15.05	7.13954	5.26094	8.30351	5.58807	5.42099	6.00392	9.08913
15.0667	7.13314	5.31133	8.30639	5.59066	5.4169	6.00331	9.08611
15.0833	7.12673	5.36173	8.30928	5.59325	5.41282	6.00269	9.08309
15.1	7.12033	5.41212	8.31216	5.59584	5.40873	6.00208	9.08008
15.1167	7.11393	5.46251	8.31505	5.59843	5.40465	6.00147	9.07708
15.1333	7.10753	5.5129	8.30631	5.60102	5.40058	6.00085	9.07408
15.15	7.10113	5.56328	8.28419	5.6036	5.3965	6.00024	9.0711
15.1667	7.09474	5.61366	8.26208	5.60619	5.39243	5.99963	9.06812
15.1833	7.08834	5.62067	8.23997	5.60879	5.38836	5.99902	9.06515
15.2	7.08195	5.60865	8.21786	5.61138	5.38429	5.99842	9.06218
15.2167	7.07556	5.59662	8.19576	5.61397	5.38022	5.99781	9.05922
15.2333	7.06917	5.5846	8.17366	5.61656	5.37616	5.9972	9.05628
15.25	7.06278	5.57258	8.15157	5.61915	5.3721	5.9966	9.05333
15.2667	7.05639	5.56056	8.12948	5.62174	5.36804	5.99599	9.0504
15.2833	7.05	5.54854	8.1074	5.62434	5.36399	5.99539	9.04747
15.3	7.04362	5.53652	8.09738	5.62693	5.35994	5.99478	9.04455
15.3167	7.03724	5.5245	8.10547	5.62952	5.35589	5.99418	9.04164
15.3333	7.03086	5.51248	8.11356	5.63212	5.35184	5.99358	9.03873
15.35	7.03173	5.50047	8.12165	5.63535	5.34832	5.99298	9.03583
15.3667	7.03521	5.48846	8.12974	5.63889	5.34491	5.99237	9.03294
15.3833	7.0387	5.47644	8.13783	5.64243	5.3415	5.99177	9.03006
15.4	7.04219	5.46443	8.14591	5.64597	5.3381	5.99118	9.02718
15.4167	7.04567	5.45242	8.154	5.64951	5.3347	5.99089	9.02431
15.4333	7.04916	5.44041	8.16208	5.65305	5.3313	5.99067	9.02145
15.45	7.05264	5.4284	8.17017	5.65659	5.3279	5.99044	9.0186
15.4667	7.05612	5.41639	8.17826	5.66013	5.3245	5.99022	9.01575
15.4833	7.05961	5.40439	8.18634	5.66367	5.32111	5.99	9.01291
15.5	7.06309	5.39238	8.19443	5.66721	5.31772	5.98978	9.01007
15.5167	7.06657	5.38482	8.20251	5.67075	5.31433	5.98956	9.00725
15.5333	7.07005	5.37987	8.21059	5.67429	5.31095	5.98934	9.00443
15.55	7.07353	5.37492	8.21867	5.67783	5.30756	5.98912	9.00161
15.5667	7.07701	5.36997	8.22676	5.68137	5.30418	5.9889	8.99881
15.5833	7.08049	5.36502	8.23484	5.68491	5.3008	5.98868	8.99601
15.6	7.08396	5.36008	8.24292	5.68845	5.29742	5.98847	8.99322
15.6167	7.08744	5.35513	8.251	5.69199	5.29405	5.98825	8.99043
15.6333	7.09092	5.35018	8.25609	5.69553	5.29067	5.98804	8.98766
15.65	7.09439	5.34524	8.25536	5.69907	5.2873	5.98782	8.98488
15.6667	7.09787	5.34029	8.25464	5.70262	5.28393	5.98761	8.98212
15.6833	7.10134	5.33535	8.25392	5.70616	5.28057	5.98739	8.97936
15.7	7.10481	5.3304	8.2532	5.7097	5.2772	5.98718	8.97661
15.7167	7.10829	5.32546	8.25248	5.71324	5.27384	5.98697	8.97387
15.7333	7.11176	5.32052	8.25175	5.71678	5.27048	5.98675	8.97113
15.75	7.11523	5.31557	8.25104	5.72033	5.26712	5.98654	8.9684
15.7667	7.1187	5.31063	8.25032	5.72387	5.26376	5.98633	8.96568
15.7833	7.12217	5.30569	8.2496	5.72741	5.26041	5.98612	8.96296
15.8	7.12564	5.30075	8.24888	5.73095	5.25706	5.98591	8.96026
15.8167	7.12911	5.29581	8.24817	5.7345	5.25371	5.9857	8.95755
15.8333	7.13258	5.29087	8.24745	5.73804	5.25036	5.98549	8.95486
15.85	7.1271	5.28593	8.24674	5.74168	5.24511	5.98529	8.95217
15.8667	7.11721	5.28099	8.24603	5.74537	5.23938	5.98508	8.94949
15.8833	7.10733	5.27605	8.24531	5.74905	5.23366	5.98487	8.94681
15.9	7.09745	5.27112	8.2446	5.75274	5.22794	5.98467	8.94414
15.9167	7.08757	5.26618	8.24389	5.75643	5.22222	5.98513	8.94148
15.9333	7.07769	5.26124	8.24318	5.76012	5.21651	5.98581	8.93882
15.95	7.06781	5.25631	8.24247	5.76381	5.2108	5.98648	8.93617
15.9667	7.05794	5.25137	8.24176	5.7675	5.20509	5.98716	8.93353
15.9833	7.04807	5.24644	8.24105	5.77119	5.19939	5.98783	8.9309
16	7.0382	5.2415	8.24035	5.77488	5.19369	5.98851	8.92827
16.0167	7.02833	5.24092	8.23964	5.77857	5.18799	5.98919	8.92564
16.0333	7.01847	5.24362	8.23893	5.78226	5.18229	5.98986	8.92303
16.05	7.00861	5.24631	8.23823	5.78595	5.1766	5.99054	8.92042
16.0667	6.99875	5.24901	8.23753	5.78964	5.17091	5.99122	8.91782
16.0833	6.98889	5.25171	8.23682	5.79333	5.16522	5.99189	8.91522
16.1	6.97904	5.25441	8.23612	5.79702	5.15954	5.99257	8.91263
16.1167	6.96918	5.2571	8.23542	5.80071	5.15385	5.99325	8.91004
16.1333	6.95933	5.2598	8.23403	5.8044	5.14818	5.99393	8.90747
16.15	6.94948	5.2625	8.23086	5.80809	5.1425	5.9946	8.90489
16.1667	6.93963	5.2652	8.22769	5.81178	5.13683	5.99528	8.90233
16.1833	6.92979	5.26789	8.22453	5.81547	5.13116	5.99596	8.89977
16.2	6.91995	5.27059	8.22136	5.81917	5.12549	5.99664	8.89722
16.2167	6.91011	5.27329	8.2182	5.82286	5.11983	5.99732	8.89467
16.2333	6.90027	5.27598	8.21504	5.82655	5.11417	5.998	8.89213
16.25	6.89043	5.27868	8.21188	5.83024	5.10851	5.99868	8.8896
16.2667	6.8806	5.28138	8.20872	5.83393	5.10285	5.99936	8.88707
16.2833	6.87076	5.28408	8.20556	5.83762	5.0972	6.00004	8.88455
16.3	6.86093	5.28678	8.20241	5.84131	5.09155	6.00072	8.88204
16.3167	6.85111	5.28947	8.19925	5.845	5.0859	6.0014	8.87953
16.3333	6.84128	5.29217	8.1961	5.8487	5.08026	6.00208	8.87703
16.35	6.83651	5.29487	8.19294	5.83889	5.08579	6.00276	8.87453
16.3667	6.83497	5.29757	8.18979	5.8208	5.09456	6.00344	8.87205
16.3833	6.83343	5.30027	8.18664	5.80273	5.10333	6.00413	8.86956
16.4	6.83189	5.30297	8.18349	5.78465	5.11209	6.00481	8.86708
16.4167	6.83035	5.30566	8.18034	5.76659	5.12086	5.99434	8.86461
16.4333	6.82882	5.30836	8.17719	5.74852	5.12962	5.9791	8.86215
16.45	6.82728	5.31106	8.17404	5.73047	5.13838	5.96387	8.85969
16.4667	6.82574	5.31376	8.1709	5.71242	5.14713	5.94864	8.85724
16.4833	6.8242	5.31646	8.16775	5.69437	5.15589	5.93342	8.85479
16.5	6.82267	5.31916	8.16461	5.67633	5.16464	5.9182	8.85235
16.5167	6.82113	5.3148	8.16146	5.65829	5.17339	5.90299	8.84992
16.5333	6.8196	5.30354	8.15832	5.64026	5.18213	5.88779	8.84749
16.55	6.81806	5.29228	8.15518	5.62223	5.19088	5.87259	8.84506
16.5667	6.81653	5.28102	8.15204	5.60421	5.19962	5.8574	8.84265
16.5833	6.81499	5.26976	8.1489	5.58619	5.20836	5.84221	8.84024
16.6	6.81346	5.2585	8.14577	5.56818	5.21709	5.82703	8.83783
16.6167	6.81192	5.24724	8.14263	5.55017	5.22583	5.81186	8.83544
16.6333	6.81039	5.23598	8.1385	5.53217	5.23456	5.79669	8.83304
16.65	6.80885	5.22473	8.13076	5.51417	5.24329	5.78152	8.83066
16.6667	6.80732	5.21347	8.12302	5.49618	5.25202	5.76637	8.82827
16.6833	6.80579	5.20222	8.11528	5.47819	5.26074	5.75121	8.8259
16.7	6.80426	5.19096	8.10755	5.46021	5.26947	5.73607	8.82353
16.7167	6.80273	5.17971	8.09981	5.44223	5.27819	5.72093	8.82117
16.7333	6.8012	5.16846	8.09208	5.42426	5.2869	5.70579	8.81881
16.75	6.79967	5.15721	8.08435	5.40629	5.29562	5.69066	8.81646
16.7667	6.79813	5.14596	8.07662	5.38833	5.30433	5.67554	8.81411
16.7833	6.7966	5.13471	8.06889	5.37037	5.31304	5.66042	8.81178
16.8	6.79507	5.12346	8.06116	5.35242	5.32175	5.64531	8.80944
16.8167	6.79354	5.11221	8.05344	5.33447	5.33046	5.63021	8.80711
16.8333	6.79202	5.10096	8.04572	5.31653	5.33916	5.61511	8.80479
16.85	6.79385	5.08972	8.038	5.31047	5.33331	5.60001	8.80247
16.8667	6.7985	5.07847	8.03028	5.31233	5.32249	5.58492	8.80016
16.8833	6.80315	5.06723	8.02256	5.31419	5.31167	5.56984	8.79786
16.9	6.8078	5.05599	8.01484	5.31605	5.30085	5.55476	8.79556
16.9167	6.81245	5.04474	8.00712	5.31791	5.29004	5.55039	8.79326
16.9333	6.81709	5.0335	7.99941	5.31977	5.27923	5.55203	8.79097
16.95	6.82174	5.02226	7.9917	5.32163	5.26843	5.55368	8.78869
16.9667	6.82638	5.01102	7.98399	5.32349	5.25763	5.55532	8.78641
16.9833	6.83102	4.99978	7.97628	5.32536	5.24684	5.55696	8.78414
17	6.83567	4.98854	7.96857	5.32722	5.23605	5.5586	8.78188
17.0167	6.84031	4.98708	7.96087	5.32908	5.22526	5.56025	8.77962
17.0333	6.84495	4.99807	7.95316	5.33094	5.21448	5.56189	8.77736
17.05	6.84958	5.00906	7.94546	5.33281	5.20371	5.56353	8.77511
17.0667	6.85422	5.02005	7.93776	5.33467	5.19294	5.56517	8.77287
17.0833	6.85886	5.03104	7.93006	5.33654	5.18217	5.56681	8.77063
17.1	6.8635	5.04202	7.92237	5.3384	5.17141	5.56845	8.7684
17.1167	6.86813	5.05301	7.91467	5.34027	5.16065	5.5701	8.76617
17.1333	6.87277	5.064	7.90958	5.34214	5.1499	5.57174	8.76395
17.15	6.8774	5.07498	7.91928	5.344	5.13915	5.57338	8.76174
17.1667	6.88203	5.08597	7.92898	5.34587	5.12841	5.57502	8.75953
17.1833	6.88667	5.09696	7.93868	5.34774	5.11767	5.57666	8.75732
17.2	6.8913	5.10794	7.94837	5.3496	5.10693	5.5783	8.75512
17.2167	6.89593	5.11892	7.95807	5.35147	5.0962	5.57994	8.75293
17.2333	6.90056	5.12991	7.96777	5.35334	5.08548	5.58158	8.75074
17.25	6.90518	5.14089	7.97746	5.35521	5.07475	5.58322	8.74855
17.2667	6.90981	5.15187	7.98715	5.35708	5.06404	5.58486	8.74638
17.2833	6.91444	5.16286	7.99685	5.35895	5.05332	5.5865	8.7442
17.3	6.91906	5.17384	8.00654	5.36082	5.04262	5.58814	8.74204
17.3167	6.92369	5.18482	8.01623	5.36269	5.03191	5.58978	8.73987
17.3333	6.92831	5.1958	8.02593	5.36456	5.02121	5.59142	8.73772
17.35	6.92801	5.20678	8.03561	5.36815	5.01401	5.59305	8.73557
17.3667	6.92239	5.21776	8.04531	5.37303	5.0082	5.59469	8.73342
17.3833	6.91676	5.22874	8.05499	5.37792	5.00239	5.59633	8.73128
17.4	6.91114	5.23972	8.06468	5.3828	4.99659	5.59797	8.72914
17.4167	6.90552	5.2507	8.07437	5.38768	4.99079	5.59412	8.72701
17.4333	6.8999	5.26168	8.08406	5.39257	4.98499	5.5863	8.72489
17.45	6.89428	5.27266	8.09374	5.39745	4.97919	5.57848	8.72277
17.4667	6.88866	5.28364	8.10343	5.40233	4.9734	5.57066	8.72065
17.4833	6.88304	5.29462	8.11312	5.40722	4.96761	5.56285	8.71854
17.5	6.87742	5.30559	8.1228	5.4121	4.96182	5.55504	8.71644
17.5167	6.87181	5.31024	8.13249	5.41698	4.95604	5.54723	8.71434
17.5333	6.8662	5.30457	8.14217	5.42186	4.95026	5.53942	8.71225
17.55	6.86058	5.2989	8.15185	5.42675	4.94448	5.53162	8.71016
17.5667	6.85497	5.29324	8.16153	5.43163	4.9387	5.52383	8.70807
17.5833	6.84936	5.28757	8.17121	5.43651	4.93292	5.51603	8.70599
17.6	6.84375	5.2819	8.18089	5.44139	4.92715	5.50824	8.70392
17.6167	6.83815	5.27623	8.19057	5.44627	4.92138	5.50045	8.70185
17.6333	6.83254	5.27056	8.19892	5.45115	4.91561	5.49266	8.69979
17.65	6.82694	5.2649	8.19285	5.45603	4.90985	5.48488	8.69773
17.6667	6.82133	5.25923	8.18678	5.46091	4.90409	5.4771	8.69568
17.6833	6.81573	5.25357	8.18071	5.46579	4.89833	5.46932	8.69363
17.7	6.81013	5.2479	8.17465	5.47067	4.89257	5.46155	8.69159
17.7167	6.80453	5.24224	8.16859	5.47555	4.88682	5.45378	8.68955
17.7333	6.79893	5.23657	8.16253	5.48043	4.88107	5.44601	8.68752
17.75	6.79333	5.23091	8.15647	5.48531	4.87532	5.43825	8.68549
17.7667	6.78773	5.22525	8.15041	5.49019	4.86957	5.43048	8.68346
17.7833	6.78214	5.21958	8.14435	5.49507	4.86383	5.42272	8.68145
17.8	6.77654	5.21392	8.13829	5.49994	4.85809	5.41497	8.67943
17.8167	6.77095	5.20826	8.13224	5.50482	4.85235	5.40721	8.67742
17.8333	6.76536	5.2026	8.12619	5.5097	4.84661	5.39946	8.67542
17.85	6.75717	5.19694	8.12013	5.50912	4.84688	5.39172	8.67342
17.8667	6.74539	5.19128	8.11408	5.50398	4.84977	5.38397	8.67143
17.8833	6.73362	5.18562	8.10803	5.49885	4.85266	5.37623	8.66944
17.9	6.72185	5.17996	8.10199	5.49372	4.85556	5.36849	8.66746
17.9167	6.71008	5.1743	8.09594	5.48859	4.85845	5.36827	8.66548
17.9333	6.69831	5.16865	8.08989	5.48346	4.86134	5.37499	8.6635
17.95	6.68654	5.16299	8.08385	5.47833	4.86424	5.38171	8.66153
17.9667	6.67478	5.15733	8.07781	5.47321	4.86713	5.38842	8.65957
17.9833	6.66302	5.15167	8.07176	5.46809	4.87002	5.39513	8.65761
18	6.65126	5.14602	8.06572	5.46297	4.87291	5.40184	8.65566
18.0167	6.63951	5.14279	8.05968	5.45785	4.8758	5.40855	8.65371
18.0333	6.62776	5.14485	8.05364	5.45273	4.87869	5.41525	8.65176
18.05	6.616	5.14691	8.04761	5.44761	4.88158	5.42195	8.64982
18.0667	6.60426	5.14896	8.04157	5.4425	4.88447	5.42866	8.64788
18.0833	6.59251	5.15102	8.03554	5.43739	4.88736	5.43536	8.64595
18.1	6.58077	5.15308	8.0295	5.43227	4.89025	5.44205	8.64403
18.1167	6.56903	5.15514	8.02347	5.42717	4.89314	5.44875	8.6421
18.1333	6.55729	5.15719	8.01749	5.42206	4.89603	5.45544	8.64019
18.15	6.54556	5.15925	8.01408	5.41695	4.89892	5.46213	8.63828
18.1667	6.53383	5.16131	8.01066	5.41185	4.90181	5.46883	8.63637
18.1833	6.5221	5.16337	8.00725	5.40675	4.90469	5.47551	8.63447
18.2	6.51037	5.16543	8.00384	5.40165	4.90758	5.4822	8.63257
18.2167	6.49864	5.16748	8.00043	5.39655	4.91047	5.48888	8.63067
18.2333	6.48692	5.16954	7.99702	5.39145	4.91335	5.49556	8.62879
18.25	6.4752	5.1716	7.99361	5.38636	4.91624	5.50225	8.6269
18.2667	6.46348	5.17366	7.9902	5.38126	4.91912	5.50892	8.62502
18.2833	6.45177	5.17572	7.98679	5.37617	4.92201	5.5156	8.62314
18.3	6.44005	5.17778	7.98338	5.37108	4.92489	5.52228	8.62127
18.3167	6.42834	5.17984	7.97998	5.36599	4.92778	5.52895	8.61941
18.3333	6.41664	5.18189	7.97657	5.3609	4.93066	5.53562	8.61754
18.35	6.40703	5.18395	7.97317	5.35397	4.93453	5.54229	8.61569
18.3667	6.40125	5.18601	7.96976	5.34535	4.93886	5.54896	8.61384
18.3833	6.39546	5.18807	7.96636	5.33674	4.9432	5.55562	8.61199
18.4	6.38968	5.19013	7.96296	5.32813	4.94753	5.56229	8.61015
18.4167	6.3839	5.19219	7.95956	5.31953	4.95186	5.55981	8.60831
18.4333	6.37812	5.19425	7.95616	5.31092	4.9562	5.54639	8.60647
18.45	6.37234	5.19631	7.95276	5.30232	4.96053	5.53297	8.60464
18.4667	6.36657	5.19837	7.94936	5.29372	4.96486	5.51956	8.60282
18.4833	6.36079	5.20042	7.94596	5.28512	4.96919	5.50616	8.601
18.5	6.35502	5.20248	7.94257	5.27653	4.97352	5.49275	8.59918
18.5167	6.34924	5.2033	7.93917	5.26794	4.97784	5.47936	8.59737
18.5333	6.34347	5.20039	7.93578	5.25935	4.98217	5.46597	8.59556
18.55	6.3377	5.19749	7.93238	5.25076	4.9865	5.45258	8.59375
18.5667	6.33193	5.19458	7.92899	5.24217	4.99082	5.4392	8.59196
18.5833	6.32616	5.19167	7.9256	5.23359	4.99515	5.42582	8.59016
18.6	6.32039	5.18877	7.92221	5.22501	4.99947	5.41245	8.58837
18.6167	6.31463	5.18586	7.91882	5.21643	5.00379	5.39908	8.58659
18.6333	6.30886	5.18295	7.91543	5.20785	5.00812	5.38572	8.5848
18.65	6.3031	5.18005	7.91402	5.19928	5.01244	5.37236	8.58303
18.6667	6.29734	5.17714	7.9127	5.19071	5.01676	5.35901	8.58125
18.6833	6.29158	5.17424	7.91138	5.18214	5.02108	5.34566	8.57949
18.7	6.28582	5.17133	7.91006	5.17357	5.0254	5.33231	8.57772
18.7167	6.28006	5.16843	7.90875	5.165	5.02972	5.31897	8.57596
18.7333	6.2743	5.16552	7.90743	5.15644	5.03403	5.30564	8.57421
18.75	6.26855	5.16262	7.90611	5.14788	5.03835	5.29231	8.57245
18.7667	6.26279	5.15972	7.9048	5.13932	5.04267	5.27898	8.57071
18.7833	6.25704	5.15681	7.90348	5.13076	5.04698	5.26566	8.56896
18.8	6.25128	5.15391	7.90217	5.12221	5.05129	5.25235	8.56722
18.8167	6.24553	5.15101	7.90085	5.11366	5.05561	5.23904	8.56549
18.8333	6.23978	5.14811	7.89954	5.10511	5.05992	5.22573	8.56376
18.85	6.23557	5.1452	7.89823	5.10344	5.05914	5.21243	8.56203
18.8667	6.23502	5.1423	7.89692	5.10851	5.05555	5.19913	8.56031
18.8833	6.23448	5.1394	7.89561	5.11358	5.05196	5.18584	8.55859
18.9	6.23393	5.1365	7.8943	5.11865	5.04838	5.17255	8.55688
18.9167	6.23339	5.1336	7.89299	5.12372	5.04479	5.1703	8.55517
18.9333	6.23284	5.1307	7.89168	5.12879	5.04121	5.18531	8.55346
18.95	6.2323	5.1278	7.89037	5.13386	5.03763	5.20031	8.55176
18.9667	6.23175	5.1249	7.88906	5.13893	5.03406	5.2153	8.55007
18.9833	6.23121	5.122	7.88775	5.144	5.03048	5.23029	8.54837
19	6.23066	5.1191	7.88645	5.14907	5.02691	5.24528	8.54668
19.0167	6.23012	5.1162	7.88514	5.15414	5.02333	5.26026	8.545
19.0333	6.22957	5.1133	7.88384	5.15921	5.01976	5.27524	8.54332
19.05	6.22903	5.1104	7.88253	5.16427	5.0162	5.29022	8.54164
19.0667	6.22848	5.10751	7.88123	5.16934	5.01263	5.30519	8.53997
19.0833	6.22794	5.10461	7.87992	5.17441	5.00906	5.32015	8.5383
19.1	6.2274	5.10171	7.87862	5.17948	5.0055	5.33511	8.53664
19.1167	6.22685	5.09882	7.87732	5.18454	5.00194	5.35007	8.53498
19.1333	6.22631	5.09592	7.87602	5.18961	4.99838	5.36502	8.53332
19.15	6.22576	5.09302	7.87457	5.19468	4.99482	5.37996	8.53167
19.1667	6.22522	5.09013	7.87311	5.19974	4.99126	5.3949	8.53002
19.1833	6.22468	5.08723	7.87165	5.20481	4.9877	5.40984	8.52838
19.2	6.22413	5.08433	7.87019	5.20987	4.98415	5.42477	8.52674
19.2167	6.22359	5.08144	7.86873	5.21494	4.9806	5.4397	8.5251
19.2333	6.22305	5.07854	7.86727	5.22	4.97705	5.45462	8.52347
19.25	6.22251	5.07565	7.86581	5.22506	4.9735	5.46954	8.52184
19.2667	6.22196	5.07276	7.86436	5.23013	4.96995	5.48446	8.52021
19.2833	6.22142	5.06986	7.8629	5.23519	4.9664	5.49937	8.51859
19.3	6.22088	5.06697	7.86144	5.24026	4.96286	5.51427	8.51698
19.3167	6.22034	5.06407	7.85999	5.24532	4.95932	5.52917	8.51536
19.3333	6.21979	5.06118	7.85853	5.25038	4.95578	5.54407	8.51376
19.35	6.22353	5.05829	7.85708	5.25336	4.95358	5.55896	8.51215
19.3667	6.2416	5.0554	7.85562	5.25407	4.95222	5.57385	8.51055
19.3833	6.25967	5.0525	7.85417	5.25479	4.95087	5.58873	8.50895
19.4	6.27773	5.04961	7.85272	5.25551	4.94952	5.60361	8.50736
19.4167	6.29579	5.04672	7.85127	5.25622	4.94816	5.6095	8.50577
19.4333	6.31384	5.04383	7.84981	5.25694	4.94681	5.59717	8.50418
19.45	6.33189	5.04094	7.84836	5.25766	4.94546	5.58484	8.5026
19.4667	6.34994	5.03805	7.84691	5.25838	4.94411	5.57251	8.50102
19.4833	6.36798	5.03516	7.84546	5.2591	4.94276	5.56019	8.49945
19.5	6.38602	5.03227	7.84401	5.25982	4.94142	5.54788	8.49788
19.5167	6.40405	5.02938	7.84257	5.26054	4.94007	5.53556	8.49631
19.5333	6.42208	5.02649	7.84112	5.26126	4.93873	5.52326	8.49475
19.55	6.44011	5.0236	7.83967	5.26198	4.93738	5.51095	8.49319
19.5667	6.45814	5.02071	7.83822	5.2627	4.93604	5.49865	8.49163
19.5833	6.47616	5.01782	7.83678	5.26342	4.93469	5.48636	8.49008
19.6	6.49417	5.01493	7.83533	5.26415	4.93335	5.47407	8.48853
19.6167	6.51219	5.01204	7.83389	5.26487	4.93201	5.46178	8.48699
19.6333	6.53019	5.00915	7.83244	5.26559	4.93067	5.4495	8.48545
19.65	6.5482	5.00627	7.831	5.26631	4.92933	5.43722	8.48391
19.6667	6.5662	5.00338	7.82956	5.26704	4.92799	5.42495	8.48238
19.6833	6.5842	5.00049	7.82811	5.26776	4.92666	5.41268	8.48085
19.7	6.6022	4.99761	7.82667	5.26849	4.92532	5.40041	8.47933
19.7167	6.62019	4.99472	7.82523	5.26921	4.92398	5.38815	8.4778
19.7333	6.63818	4.99183	7.82379	5.26994	4.92265	5.37589	8.47629
19.75	6.65616	4.98895	7.82235	5.27067	4.92131	5.36364	8.47477
19.7667	6.67414	4.98602	7.82091	5.27139	4.91998	5.35139	8.47326
19.7833	6.69212	4.98267	7.81947	5.27212	4.91865	5.33914	8.47175
19.8	6.71009	4.97931	7.81803	5.27285	4.91732	5.3269	8.47025
19.8167	6.72806	4.97596	7.8166	5.27358	4.91599	5.31467	8.46875
19.8333	6.74602	4.97261	7.81516	5.2743	4.91466	5.30243	8.46725
19.85	6.76399	4.96926	7.81372	5.27413	4.91333	5.29021	8.46576
19.8667	6.78194	4.96591	7.81229	5.27281	4.912	5.27798	8.46427
19.8833	6.7999	4.96256	7.81085	5.27149	4.91068	5.26576	8.46278
19.9	6.81785	4.95921	7.80942	5.27017	4.90935	5.25355	8.4613
19.9167	6.8358	4.95586	7.80798	5.26885	4.90803	5.24385	8.45982
19.9333	6.85374	4.95251	7.80655	5.26753	4.9067	5.24096	8.45835
19.95	6.87168	4.94916	7.80511	5.26631	4.90538	5.23806	8.45688
19.9667	6.88962	4.94581	7.80368	5.26518	4.90406	5.23517	8.45541
19.9833	6.90755	4.94247	7.80225	5.26405	4.90275	5.23228	8.45395
20	6.92548	4.93912	7.80082	5.26292	4.90147	5.22939	8.45248
20.0167	6.9434	4.93577	7.79939	5.26179	4.90018	5.2265	8.45103
20.0333	6.96132	4.93242	7.79796	5.26066	4.8989	5.22361	8.44957
20.05	6.97924	4.92908	7.7965	5.25953	4.89761	5.222	8.44812
20.0667	6.99716	4.92573	7.79503	5.2584	4.89633	5.22039	8.44667
20.0833	7.01528	4.92239	7.79355	5.25728	4.89504	5.21877	8.44523
20.1	7.02873	4.91904	7.79207	5.25615	4.89376	5.21717	8.44379
20.1167	7.01091	4.9157	7.79059	5.25502	4.89248	5.21555	8.44236
20.1333	6.99309	4.91235	7.78912	5.2539	4.8912	5.21394	8.44092
20.15	6.97528	4.90901	7.78764	5.25277	4.88992	5.21234	8.43949
20.1667	6.95748	4.90566	7.78617	5.25165	4.88864	5.21073	8.43807
20.1833	6.93967	4.90232	7.78469	5.25053	4.88736	5.20912	8.4368
20.2	6.92187	4.89897	7.78322	5.24941	4.88609	5.20784	8.43554
20.2167	6.90407	4.89563	7.78174	5.24829	4.88481	5.20656	8.43428
20.2333	6.88627	4.89229	7.78027	5.24716	4.88354	5.20528	8.43302
20.25	6.86848	4.88894	7.7788	5.24604	4.88226	5.204	8.43177
20.2667	6.85068	4.8856	7.77733	5.24493	4.88099	5.20272	8.43052
20.2833	6.8329	4.88226	7.77586	5.24381	4.87971	5.20144	8.42928
20.3	6.81511	4.87892	7.77439	5.24269	4.87844	5.20017	8.42803
20.3167	6.79732	4.87558	7.77292	5.24157	4.87717	5.19889	8.42679
20.3333	6.77954	4.87223	7.77145	5.24045	4.8759	5.19761	8.42556
20.35	6.76177	4.86889	7.76998	5.23934	4.87463	5.19634	8.42433
20.3667	6.74399	4.86555	7.76851	5.23822	4.87336	5.19506	8.4231
20.3833	6.72621	4.86221	7.76704	5.23711	4.8721	5.19379	8.42187
20.4	6.70845	4.85887	7.76558	5.23599	4.87083	5.19251	8.42065
20.4167	6.69068	4.85553	7.76411	5.23488	4.86956	5.19124	8.41943
20.4333	6.67291	4.85219	7.76264	5.23377	4.8683	5.18997	8.41821
20.45	6.65515	4.84885	7.76118	5.23265	4.86703	5.18869	8.417
20.4667	6.63739	4.84551	7.75971	5.23154	4.86577	5.18742	8.41579
20.4833	6.61963	4.84217	7.75825	5.23043	4.86451	5.18615	8.41458
20.5	6.60188	4.83884	7.75679	5.22932	4.86325	5.18488	8.41338
20.5167	6.58412	4.8355	7.75532	5.22821	4.86199	5.18361	8.41218
20.5333	6.56637	4.83216	7.75386	5.2271	4.86073	5.18234	8.41098
20.55	6.54863	4.82882	7.7524	5.22599	4.85947	5.18107	8.40979
20.5667	6.53088	4.82548	7.75094	5.22489	4.85821	5.1798	8.4086
20.5833	6.51314	4.82215	7.74948	5.22378	4.85695	5.17854	8.40741
20.6	6.4954	4.81881	7.74802	5.22267	4.85569	5.17727	8.40623
20.6167	6.47767	4.81547	7.74656	5.22157	4.85444	5.176	8.40505
20.6333	6.45993	4.81214	7.7451	5.22046	4.85318	5.17474	8.40387
20.65	6.4422	4.8088	7.74364	5.21936	4.85193	5.17347	8.40269
20.6667	6.42447	4.80546	7.74218	5.21825	4.85067	5.17221	8.40152
20.6833	6.40675	4.80213	7.74072	5.21715	4.84942	5.17094	8.40035
20.7	6.38903	4.79879	7.73927	5.21605	4.84817	5.16968	8.39919
20.7167	6.37131	4.79546	7.73781	5.21494	4.84692	5.16841	8.39802
20.7333	6.35359	4.79212	7.73635	5.21384	4.84567	5.16715	8.39687
20.75	6.33587	4.78879	7.7349	5.21274	4.84442	5.16589	8.39571
20.7667	6.31816	4.78545	7.73345	5.21164	4.84317	5.16463	8.39456
20.7833	6.30045	4.78212	7.73199	5.21054	4.84192	5.16337	8.39341
20.8	6.28274	4.77879	7.73054	5.20944	4.84068	5.16211	8.39226
20.8167	6.26504	4.77545	7.72908	5.20834	4.83943	5.16085	8.39111
20.8333	6.24734	4.77212	7.72763	5.20725	4.83818	5.15959	8.38997
20.85	6.23042	4.76879	7.72618	5.20615	4.83694	5.15833	8.38884
20.8667	6.23506	4.76545	7.72473	5.20505	4.83569	5.15707	8.3877
20.8833	6.23971	4.76212	7.72328	5.20396	4.83445	5.15581	8.38657
20.9	6.24435	4.75879	7.72183	5.20286	4.83321	5.15456	8.38544
20.9167	6.249	4.75546	7.72038	5.20177	4.83197	5.1533	8.38432
20.9333	6.25364	4.75213	7.71893	5.20067	4.83073	5.15204	8.38319
20.95	6.25828	4.74879	7.71748	5.19958	4.82949	5.15079	8.38207
20.9667	6.26293	4.74546	7.71603	5.19848	4.82825	5.14953	8.38096
20.9833	6.26757	4.74213	7.71458	5.19739	4.82701	5.14828	8.37984
21	6.27221	4.7388	7.71314	5.1963	4.82577	5.14703	8.37873
21.0167	6.27685	4.73547	7.71169	5.19521	4.82454	5.14577	8.37762
21.0333	6.28149	4.73261	7.71025	5.19412	4.8233	5.14452	8.37652
21.05	6.28613	4.72978	7.7088	5.19303	4.82206	5.14327	8.37542
21.0667	6.29077	4.72696	7.70735	5.19194	4.82083	5.14202	8.37432
21.0833	6.29541	4.72413	7.70591	5.19085	4.8196	5.14077	8.37322
21.1	6.30005	4.7213	7.70447	5.18976	4.81836	5.13952	8.37213
21.1167	6.30468	4.71848	7.70302	5.18867	4.81713	5.13827	8.37104
21.1333	6.30932	4.71565	7.70158	5.18759	4.8159	5.13702	8.36995
21.15	6.31396	4.71283	7.70014	5.1865	4.81467	5.13577	8.36887
21.1667	6.31859	4.71	7.6987	5.18541	4.81344	5.13452	8.36778
21.1833	6.32323	4.70717	7.69726	5.18433	4.81221	5.13327	8.3667
21.2	6.32786	4.70435	7.69582	5.18324	4.81098	5.13202	8.36563
21.2167	6.33249	4.70152	7.69438	5.18216	4.80976	5.13078	8.36456
21.2333	6.33713	4.6987	7.69294	5.18108	4.80853	5.12953	8.36349
21.25	6.34176	4.69587	7.6915	5.17999	4.8073	5.12829	8.36242
21.2667	6.34639	4.69305	7.69006	5.17891	4.80608	5.12704	8.36135
21.2833	6.35102	4.69023	7.68862	5.17783	4.80485	5.1258	8.36029
21.3	6.35565	4.6874	7.68718	5.17675	4.80363	5.12455	8.35923
21.3167	6.36028	4.68458	7.68575	5.17567	4.80241	5.12331	8.35818
21.3333	6.36491	4.68176	7.68431	5.17458	4.80119	5.12207	8.35712
21.35	6.36954	4.67893	7.68287	5.17351	4.79996	5.12082	8.35607
21.3667	6.36651	4.67611	7.68144	5.17243	4.79874	5.11958	8.35503
21.3833	6.36324	4.67329	7.68	5.17135	4.79752	5.11834	8.35398
21.4	6.35997	4.67046	7.67857	5.17027	4.79631	5.1171	8.35294
21.4167	6.3567	4.66764	7.67714	5.16919	4.79509	5.11586	8.3519
21.4333	6.35344	4.66482	7.6757	5.16811	4.79387	5.11462	8.35086
21.45	6.35017	4.662	7.67427	5.16704	4.79265	5.11338	8.34983
21.4667	6.3469	4.65918	7.67284	5.16596	4.79144	5.11214	8.3488
21.4833	6.34364	4.65636	7.67141	5.16489	4.79022	5.11091	8.34777
21.5	6.34037	4.65353	7.66997	5.16381	4.78901	5.10967	8.34675
21.5167	6.33711	4.65071	7.66854	5.16274	4.78779	5.10843	8.34572
21.5333	6.33384	4.66062	7.66711	5.16167	4.78658	5.10719	8.34471
21.55	6.33058	4.67242	7.66569	5.16059	4.78537	5.10596	8.34298
21.5667	6.32732	4.68423	7.66426	5.15952	4.78416	5.10472	8.34125
21.5833	6.32405	4.69603	7.66283	5.15845	4.78295	5.10349	8.33952
21.6	6.32079	4.70783	7.6614	5.15738	4.78174	5.10225	8.33779
21.6167	6.31753	4.71964	7.65997	5.15631	4.78053	5.10102	8.33606
21.6333	6.31427	4.73144	7.65854	5.15524	4.77932	5.09979	8.33433
21.65	6.31101	4.74324	7.65712	5.15417	4.77811	5.09855	8.3326
21.6667	6.30775	4.75504	7.65569	5.1531	4.7769	5.09732	8.33087
21.6833	6.30449	4.76685	7.65427	5.15203	4.7757	5.09609	8.32914
21.7	6.30123	4.77865	7.65284	5.15096	4.77449	5.09486	8.32741
21.7167	6.29797	4.79045	7.65142	5.14989	4.77329	5.09363	8.32567
21.7333	6.29471	4.80225	7.64999	5.14883	4.77208	5.0924	8.32394
21.75	6.29146	4.81405	7.64857	5.14776	4.77088	5.09117	8.32221
21.7667	6.2882	4.82585	7.64715	5.14669	4.76968	5.08994	8.32048
21.7833	6.28494	4.83765	7.64572	5.14563	4.76848	5.08871	8.31875
21.8	6.28169	4.84945	7.6443	5.14456	4.76727	5.08748	8.31702
21.8167	6.27843	4.86125	7.64288	5.1435	4.76608	5.08625	8.31529
21.8333	6.27518	4.87305	7.64146	5.14243	4.76488	5.08503	8.31356
21.85	6.27192	4.88485	7.64004	5.14137	4.76368	5.0838	8.31183
21.8667	6.26123	4.89664	7.63862	5.14031	4.76248	5.08257	8.3101
21.8833	6.2498	4.90844	7.6372	5.13925	4.76128	5.08135	8.30837
21.9	6.23837	4.92024	7.63578	5.13818	4.76008	5.08012	8.30664
21.9167	6.22694	4.93204	7.63436	5.13712	4.75889	5.0789	8.30491
21.9333	6.21552	4.94383	7.63294	5.13606	4.75769	5.07767	8.30318
21.95	6.2041	4.95563	7.63152	5.135	4.7565	5.07645	8.30145
21.9667	6.19268	4.96742	7.63011	5.13394	4.7553	5.07523	8.29972
21.9833	6.18126	4.97922	7.62869	5.13288	4.75411	5.074	8.29799
22	6.16984	4.99102	7.62727	5.13183	4.75292	5.07278	8.29626
22.0167	6.15842	5.00281	7.62586	5.13077	4.75173	5.07156	8.29453
22.0333	6.14701	4.99281	7.62444	5.12971	4.75054	5.07034	8.2928
22.05	6.1356	4.9777	7.62303	5.12865	4.74935	5.06912	8.29107
22.0667	6.12419	4.96259	7.62161	5.1276	4.74816	5.0679	8.28934
22.0833	6.11278	4.94748	7.6202	5.12654	4.74697	5.06668	8.2876
22.1	6.10137	4.93238	7.61879	5.12548	4.74578	5.06546	8.28587
22.1167	6.08996	4.91727	7.61738	5.12443	4.74459	5.06424	8.28414
22.1333	6.07856	4.90216	7.61596	5.12337	4.7434	5.06302	8.28241
22.15	6.06716	4.88706	7.61455	5.12232	4.74222	5.06181	8.28068
22.1667	6.05576	4.87195	7.61314	5.12127	4.74103	5.06059	8.27895
22.1833	6.04436	4.85685	7.61173	5.12021	4.73985	5.05937	8.27722
22.2	6.03296	4.84174	7.61032	5.11916	4.73867	5.05816	8.27549
22.2167	6.02156	4.82664	7.60891	5.11811	4.73748	5.05694	8.27376
22.2333	6.01017	4.81154	7.6075	5.11706	4.7363	5.05572	8.27203
22.25	5.99878	4.79644	7.60609	5.11601	4.73512	5.05451	8.2703
22.2667	5.98739	4.78134	7.60468	5.11496	4.73394	5.05329	8.26857
22.2833	5.976	4.76624	7.60327	5.11391	4.73276	5.05208	8.26684
22.3	5.96461	4.75114	7.60187	5.11286	4.73158	5.05087	8.26511
22.3167	5.95322	4.73604	7.60046	5.11181	4.7304	5.04966	8.26338
22.3333	5.94184	4.72094	7.59905	5.11076	4.72922	5.04844	8.26165
22.35	5.93046	4.70584	7.59765	5.10971	4.72804	5.04723	8.25992
22.3667	5.92844	4.69075	7.59624	5.10866	4.72686	5.04602	8.25819
22.3833	5.92807	4.67565	7.59484	5.10762	4.72569	5.04481	8.25646
22.4	5.9277	4.66055	7.59343	5.10657	4.72451	5.0436	8.25473
22.4167	5.92733	4.64546	7.59203	5.10552	4.72334	5.04239	8.253
22.4333	5.92696	4.63037	7.59062	5.10448	4.72216	5.04118	8.25127
22.45	5.92659	4.61527	7.58922	5.10343	4.72099	5.03997	8.24953
22.4667	5.92622	4.60018	7.58782	5.10239	4.71982	5.03876	8.2478
22.4833	5.92585	4.58509	7.58642	5.10134	4.71865	5.03755	8.24607
22.5	5.92549	4.57	7.58501	5.1003	4.71747	5.03635	8.24434
22.5167	5.92512	4.5549	7.58361	5.09926	4.7163	5.03514	8.24261
22.5333	5.92475	4.54959	7.58221	5.09821	4.71513	5.03393	8.24088
22.55	5.92438	4.54761	7.58081	5.09717	4.71396	5.03273	8.23915
22.5667	5.92401	4.54564	7.57941	5.09613	4.71279	5.03152	8.23742
22.5833	5.92365	4.54367	7.57801	5.09509	4.71163	5.03032	8.23569
22.6	5.92328	4.5417	7.57661	5.09405	4.71046	5.02911	8.23396
22.6167	5.92291	4.53972	7.57521	5.09301	4.70929	5.02791	8.23223
22.6333	5.92254	4.53775	7.57382	5.09197	4.70813	5.02671	8.2305
22.65	5.92218	4.53578	7.57242	5.09093	4.70696	5.0255	8.22877
22.6667	5.92181	4.53381	7.57102	5.08989	4.7058	5.0243	8.22704
22.6833	5.92144	4.53184	7.56963	5.08885	4.70463	5.0231	8.22531
22.7	5.92107	4.52986	7.56823	5.08781	4.70347	5.0219	8.22358
22.7167	5.92071	4.52789	7.56683	5.08678	4.70231	5.02069	8.22185
22.7333	5.92034	4.52592	7.56544	5.08574	4.70114	5.01949	8.22012
22.75	5.91997	4.52395	7.56404	5.0847	4.69998	5.01829	8.21839
22.7667	5.91961	4.52198	7.56265	5.08367	4.69882	5.01709	8.21666
22.7833	5.91924	4.52001	7.56126	5.08263	4.69766	5.01589	8.21493
22.8	5.91887	4.51804	7.55986	5.0816	4.6965	5.01469	8.2132
22.8167	5.91851	4.51607	7.55847	5.08056	4.69535	5.0135	8.21146
22.8333	5.91814	4.5141	7.55708	5.07953	4.69419	5.0123	8.20973
22.85	5.91778	4.51213	7.55568	5.07849	4.69303	5.0111	8.208
22.8667	5.92946	4.51016	7.55429	5.07746	4.69187	5.0099	8.20627
22.8833	5.94445	4.50819	7.5529	5.07643	4.69072	5.00871	8.20454
22.9	5.95943	4.50622	7.55151	5.07539	4.68956	5.00751	8.20281
22.9167	5.97441	4.50425	7.55012	5.07436	4.68841	5.00632	8.20108
22.9333	5.98939	4.50228	7.54873	5.07333	4.68725	5.00512	8.19935
22.95	6.00437	4.50031	7.54734	5.0723	4.6861	5.00393	8.19762
22.9667	6.01935	4.49835	7.54595	5.07127	4.68495	5.00273	8.19589
22.9833	6.03432	4.49638	7.54456	5.07024	4.68379	5.00154	8.19416
23	6.04929	4.49441	7.54318	5.06921	4.68264	5.00034	8.19243
23.0167	6.06426	4.49244	7.54179	5.06818	4.68149	4.99915	8.1907
23.0333	6.07923	4.49889	7.5404	5.06715	4.68034	4.99796	8.18897
23.05	6.09419	4.50931	7.53901	5.06612	4.67919	4.99677	8.18724
23.0667	6.10916	4.51973	7.53763	5.0651	4.67804	4.99558	8.18551
23.0833	6.12412	4.53015	7.53624	5.06407	4.6769	4.99438	8.18378
23.1	6.13908	4.54056	7.53486	5.06304	4.67575	4.99319	8.18205
23.1167	6.15404	4.55098	7.53347	5.06201	4.6746	4.992	8.18032
23.1333	6.16899	4.56139	7.53209	5.06099	4.67346	4.99081	8.17859
23.15	6.18395	4.57181	7.5307	5.05996	4.67231	4.98963	8.17686
23.1667	6.1989	4.58222	7.52932	5.05894	4.67117	4.98844	8.17513
23.1833	6.21385	4.59264	7.52794	5.05791	4.67002	4.98725	8.17339
23.2	6.22879	4.60305	7.52655	5.05689	4.66888	4.98606	8.17166
23.2167	6.24374	4.61347	7.52517	5.05586	4.66773	4.98487	8.16993
23.2333	6.25868	4.62388	7.52379	5.05484	4.66659	4.98369	8.1682
23.25	6.27362	4.6343	7.52241	5.05382	4.66545	4.9825	8.16647
23.2667	6.28856	4.64471	7.52103	5.0528	4.66431	4.98131	8.16474
23.2833	6.3035	4.65512	7.51965	5.05177	4.66317	4.98013	8.16301
23.3	6.31844	4.66554	7.51827	5.05075	4.66203	4.97894	8.16128
23.3167	6.33337	4.67595	7.51689	5.04973	4.66089	4.97776	8.15955
23.3333	6.3483	4.68636	7.51551	5.04871	4.65975	4.97657	8.15782
23.35	6.36323	4.69677	7.51413	5.04769	4.65861	4.97539	8.15609
23.3667	6.3651	4.70719	7.51275	5.04667	4.65748	4.97421	8.15436
23.3833	6.36201	4.7176	7.51137	5.04565	4.65634	4.97302	8.15263
23.4	6.35892	4.72801	7.51	5.04463	4.6552	4.97184	8.1509
23.4167	6.35584	4.73842	7.50862	5.04361	4.65407	4.97066	8.14917
23.4333	6.35275	4.74883	7.50724	5.04259	4.65293	4.96948	8.14744
23.45	6.34966	4.75924	7.50587	5.04157	4.6518	4.9683	8.14571
23.4667	6.34658	4.76965	7.50449	5.04056	4.65067	4.96712	8.14398
23.4833	6.34349	4.78006	7.50312	5.03954	4.64953	4.96594	8.14225
23.5	6.34041	4.79047	7.50174	5.03852	4.6484	4.96476	8.14052
23.5167	6.33733	4.80088	7.50036	5.03751	4.64727	4.96358	8.13879
23.5333	6.33424	4.79491	7.49899	5.03649	4.64614	4.9624	8.13706
23.55	6.33116	4.77889	7.49762	5.03548	4.64501	4.96122	8.13532
23.5667	6.32808	4.76287	7.49624	5.03446	4.64388	4.96004	8.13359
23.5833	6.325	4.74686	7.49487	5.03345	4.64275	4.95886	8.13186
23.6	6.32192	4.73084	7.4935	5.03243	4.64162	4.95769	8.13013
23.6167	6.31884	4.71482	7.49213	5.03142	4.64049	4.95651	8.1284
23.6333	6.31576	4.69881	7.49076	5.0304	4.63937	4.95533	8.12667
23.65	6.31268	4.68279	7.48938	5.02939	4.63824	4.95416	8.12494
23.6667	6.3096	4.66678	7.48801	5.02838	4.63711	4.95298	8.12321
23.6833	6.30652	4.65077	7.48664	5.02737	4.63599	4.95181	8.12148
23.7	6.30344	4.63475	7.48527	5.02636	4.63486	4.95063	8.11975
23.7167	6.30036	4.61874	7.48391	5.02534	4.63374	4.94946	8.11802
23.7333	6.29729	4.60273	7.48254	5.02433	4.63261	4.94828	8.11629
23.75	6.29421	4.58672	7.48117	5.02332	4.63149	4.94711	8.11456
23.7667	6.29113	4.57071	7.4798	5.02231	4.63037	4.94594	8.11283
23.7833	6.28806	4.5547	7.47843	5.0213	4.62925	4.94476	8.1111
23.8	6.28498	4.53869	7.47706	5.02029	4.62813	4.94359	8.10937
23.8167	6.28191	4.52269	7.4757	5.01929	4.62701	4.94242	8.10764
23.8333	6.27883	4.50668	7.47433	5.01828	4.62589	4.94125	8.10591
23.85	6.27576	4.49067	7.47296	5.01727	4.62477	4.94008	8.10418
23.8667	6.27322	4.47467	7.4716	5.01626	4.62365	4.93891	8.10245
23.8833	6.27095	4.45866	7.47023	5.01525	4.62253	4.93774	8.10072
23.9	6.26868	4.44266	7.46887	5.01425	4.62141	4.93657	8.09899
23.9167	6.26641	4.42665	7.46751	5.01324	4.62029	4.9354	8.09725
23.9333	6.26413	4.41065	7.46614	5.01223	4.61918	4.93423	8.09552
23.95	6.26186	4.39464	7.46478	5.01123	4.61806	4.93306	8.09379
23.9667	6.25959	4.37864	7.46341	5.01022	4.61695	4.9319	8.09206
23.9833	6.25732	4.36264	7.46205	5.00922	4.61583	4.93073	8.09033
24	6.25505	4.34664	7.46069	5.00821	4.61472	4.92956	8.0886
24.0167	6.25278	4.33064	7.45933	5.00721	4.61361	4.9284	8.08687
24.0333	6.25051	4.32333	7.45797	5.00621	4.61249	4.92723	8.08514
24.05	6.24824	4.32286	7.45661	5.0052	4.61138	4.92606	8.08341
24.0667	6.24597	4.32239	7.45524	5.0042	4.61027	4.9249	8.08168
24.0833	6.2437	4.32192	7.45388	5.0032	4.60916	4.92373	8.07995
24.1	6.24143	4.32145	7.45252	5.0022	4.60805	4.92257	8.07822
24.1167	6.23916	4.32098	7.45117	5.00119	4.60694	4.92141	8.07649
24.1333	6.2369	4.3205	7.44981	5.00019	4.60583	4.92024	8.07476
24.15	6.23463	4.32003	7.44845	4.99919	4.60472	4.91908	8.07303
24.1667	6.23236	4.31956	7.44709	4.99819	4.60361	4.91792	8.0713
24.1833	6.23009	4.31909	7.44573	4.99719	4.60251	4.91675	8.06957
24.2	6.22783	4.31862	7.44437	4.99619	4.6014	4.91559	8.06784
24.2167	6.22556	4.31815	7.44302	4.99519	4.60029	4.91443	8.06611
24.2333	6.2233	4.31768	7.44166	4.99419	4.59919	4.91327	8.06438
24.25	6.22103	4.31721	7.4403	4.99319	4.59808	4.91211	8.06265
24.2667	6.21877	4.31674	7.43895	4.99219	4.59698	4.91095	8.06092
24.2833	6.2165	4.31627	7.43759	4.9912	4.59587	4.90979	8.05918
24.3	6.21424	4.3158	7.43624	4.9902	4.59477	4.90863	8.05745
24.3167	6.21197	4.31533	7.43488	4.9892	4.59367	4.90747	8.05572
24.3333	6.20971	4.31486	7.43353	4.9882	4.59257	4.90631	8.05399
24.35	6.20745	4.31439	7.43218	4.98721	4.59146	4.90515	8.05226
24.3667	6.20519	4.31392	7.43082	4.98621	4.59036	4.904	8.05053
24.3833	6.20292	4.31345	7.42947	4.98522	4.58926	4.90284	8.0488
24.4	6.20066	4.31298	7.42812	4.98422	4.58816	4.90168	8.04707
24.4167	6.1984	4.31251	7.42676	4.98323	4.58706	4.90053	8.04534
24.4333	6.19614	4.31204	7.42541	4.98223	4.58596	4.89937	8.04361
24.45	6.19388	4.31157	7.42406	4.98124	4.58487	4.89821	8.04188
24.4667	6.19162	4.3111	7.42271	4.98024	4.58377	4.89706	8.04015
24.4833	6.18936	4.31063	7.42136	4.97925	4.58267	4.8959	8.03842
24.5	6.1871	4.31017	7.42001	4.97826	4.58158	4.89475	8.03669
24.5167	6.18484	4.3097	7.41866	4.97726	4.58048	4.8936	8.03496
24.5333	6.18258	4.30923	7.41731	4.97627	4.57938	4.89244	8.03323
24.55	6.18032	4.30876	7.41596	4.97528	4.57829	4.89129	8.0315
24.5667	6.17806	4.30829	7.41461	4.97429	4.5772	4.89014	8.02977
24.5833	6.1758	4.30782	7.41326	4.9733	4.5761	4.88898	8.02804
24.6	6.17355	4.30735	7.41192	4.97231	4.57501	4.88783	8.02631
24.6167	6.17129	4.30689	7.41057	4.97131	4.57392	4.88668	8.02458
24.6333	6.16903	4.30642	7.40922	4.97032	4.57283	4.88553	8.02285
24.65	6.16678	4.30595	7.40788	4.96933	4.57173	4.88438	8.02111
24.6667	6.16452	4.30548	7.40653	4.96835	4.57064	4.88323	8.01938
24.6833	6.16226	4.30501	7.40518	4.96736	4.56955	4.88208	8.01765
24.7	6.16001	4.30455	7.40384	4.96637	4.56846	4.88093	8.01592
24.7167	6.15775	4.30408	7.40249	4.96538	4.56738	4.87978	8.01419
24.7333	6.1555	4.30361	7.40115	4.96439	4.56629	4.87863	8.01246
24.75	6.15325	4.30314	7.3998	4.9634	4.5652	4.87748	8.01073
24.7667	6.15099	4.30268	7.39846	4.96242	4.56411	4.87633	8.009
24.7833	6.14874	4.30221	7.39712	4.96143	4.56302	4.87519	8.00727
24.8	6.14648	4.30174	7.39577	4.96044	4.56194	4.87404	8.00554
24.8167	6.14423	4.30127	7.39443	4.95946	4.56085	4.87289	8.00381
24.8333	6.14198	4.30081	7.39309	4.95847	4.55977	4.87175	8.00208
24.85	6.13973	4.30034	7.39175	4.95748	4.55868	4.8706	8.00035
24.8667	6.13748	4.29987	7.3904	4.9565	4.5576	4.86945	7.99862
24.8833	6.13523	4.29941	7.38906	4.95551	4.55652	4.86831	7.99689
24.9	6.13297	4.29894	7.38772	4.95453	4.55543	4.86716	7.99516
24.9167	6.13072	4.29847	7.38638	4.95354	4.55435	4.86602	7.99343
24.9333	6.12847	4.29801	7.38504	4.95256	4.55327	4.86487	7.9917
24.95	6.12622	4.29754	7.3837	4.95158	4.55219	4.86373	7.98997
24.9667	6.12397	4.29707	7.38236	4.95059	4.55111	4.86259	7.98824
24.9833	6.12172	4.29661	7.38102	4.94961	4.55003	4.86144	7.98651
25	6.11948	4.29614	7.37968	4.94863	4.54895	4.8603	7.98477
25.0167	6.11723	4.29568	7.37834	4.94765	4.54787	4.85916	7.98304
25.0333	6.11498	4.29521	7.37701	4.94667	4.54679	4.85802	7.98131
25.05	6.11273	4.29475	7.37567	4.94568	4.54571	4.85688	7.97958
25.0667	6.11048	4.29428	7.37433	4.9447	4.54464	4.85574	7.97785
25.0833	6.10824	4.29381	7.373	4.94372	4.54356	4.8546	7.97612
25.1	6.10599	4.29335	7.37166	4.94274	4.54248	4.85346	7.97439
25.1167	6.10375	4.29288	7.37032	4.94176	4.54141	4.85232	7.97266
25.1333	6.1015	4.29242	7.36899	4.94078	4.54033	4.85118	7.97093
25.15	6.09925	4.29195	7.36765	4.9398	4.53926	4.85004	7.9692
25.1667	6.09701	4.29149	7.36632	4.93882	4.53818	4.8489	7.96747
25.1833	6.09476	4.29102	7.36498	4.93784	4.53711	4.84776	7.96574
25.2	6.09252	4.29056	7.36365	4.93686	4.53604	4.84662	7.96401
25.2167	6.09027	4.29009	7.36231	4.93589	4.53496	4.84549	7.96228
25.2333	6.08803	4.28963	7.36098	4.93491	4.53389	4.84435	7.96055
25.25	6.08579	4.28916	7.35965	4.93393	4.53282	4.84321	7.95882
25.2667	6.08354	4.2887	7.35832	4.93295	4.53175	4.84207	7.95709
25.2833	6.0813	4.28823	7.35698	4.93198	4.53068	4.84094	7.95536
25.3	6.07906	4.28777	7.35565	4.931	4.52961	4.8398	7.95363
25.3167	6.07682	4.28731	7.35432	4.93002	4.52854	4.83867	7.9519
25.3333	6.07458	4.28684	7.35299	4.92905	4.52747	4.83753	7.95017
25.35	6.07234	4.28638	7.35166	4.92807	4.5264	4.8364	7.94844
25.3667	6.07009	4.28591	7.35033	4.9271	4.52533	4.83526	7.9467
25.3833	6.06785	4.28545	7.349	4.92612	4.52427	4.83413	7.94497
25.4	6.06561	4.28499	7.34767	4.92515	4.5232	4.833	7.94324
25.4167	6.06337	4.28452	7.34634	4.92418	4.52214	4.83187	7.94151
25.4333	6.06113	4.28406	7.34501	4.9232	4.52107	4.83073	7.93978
25.45	6.05889	4.28359	7.34368	4.92223	4.52	4.8296	7.93805
25.4667	6.05666	4.28313	7.34235	4.92125	4.51894	4.82847	7.93632
25.4833	6.05442	4.28267	7.34102	4.92028	4.51788	4.82734	7.93459
25.5	6.05218	4.2822	7.3397	4.91931	4.51681	4.82621	7.93286
25.5167	6.04994	4.28174	7.33837	4.91834	4.51575	4.82508	7.93113
25.5333	6.04771	4.28128	7.33704	4.91736	4.51469	4.82394	7.9294
25.55	6.04547	4.28082	7.33572	4.91639	4.51363	4.82281	7.92767
25.5667	6.04323	4.28035	7.33439	4.91542	4.51256	4.82169	7.92594
25.5833	6.041	4.27989	7.33307	4.91445	4.5115	4.82056	7.92421
25.6	6.03876	4.27943	7.33174	4.91348	4.51044	4.81943	7.92248
25.6167	6.03652	4.27896	7.33042	4.91251	4.50938	4.8183	7.92075
25.6333	6.03429	4.2785	7.32909	4.91154	4.50832	4.81717	7.91902
25.65	6.03205	4.27804	7.32777	4.91057	4.50727	4.81604	7.91729
25.6667	6.02982	4.27758	7.32644	4.9096	4.50621	4.81492	7.91556
25.6833	6.02759	4.27711	7.32512	4.90863	4.50515	4.81379	7.91383
25.7	6.02535	4.27665	7.3238	4.90766	4.50409	4.81266	7.9121
25.7167	6.02312	4.27619	7.32247	4.90669	4.50304	4.81154	7.91037
25.7333	6.02088	4.27573	7.32115	4.90573	4.50198	4.81041	7.90863
25.75	6.01865	4.27527	7.31983	4.90476	4.50092	4.80929	7.9069
25.7667	6.01642	4.2748	7.31851	4.90379	4.49987	4.80816	7.90517
25.7833	6.01419	4.27434	7.31718	4.90282	4.49881	4.80704	7.90344
25.8	6.01196	4.27388	7.31586	4.90186	4.49776	4.80591	7.90171
25.8167	6.00973	4.27342	7.31454	4.90089	4.49671	4.80479	7.89998
25.8333	6.00749	4.27296	7.31322	4.89992	4.49565	4.80366	7.89825
25.85	6.00526	4.2725	7.3119	4.89896	4.4946	4.80254	7.89652
25.8667	6.00303	4.27204	7.31058	4.89799	4.49355	4.80142	7.89479
25.8833	6.0008	4.27157	7.30926	4.89703	4.4925	4.80029	7.89306
25.9	5.99857	4.27111	7.30794	4.89606	4.49145	4.79917	7.89133
25.9167	5.99634	4.27065	7.30663	4.8951	4.4904	4.79805	7.8896
25.9333	5.99412	4.27019	7.30531	4.89413	4.48935	4.79693	7.88787
25.95	5.99189	4.26973	7.30399	4.89317	4.4883	4.79581	7.88614
25.9667	5.98966	4.26927	7.30267	4.8922	4.48725	4.79469	7.88441
25.9833	5.98743	4.26881	7.30136	4.89124	4.4862	4.79357	7.88268
26	5.9852	4.26835	7.30004	4.89028	4.48515	4.79245	7.88095
26.0167	5.98298	4.26789	7.29872	4.88931	4.48411	4.79133	7.87922
26.0333	5.98075	4.26743	7.29741	4.88835	4.48306	4.79021	7.87749
26.05	5.97852	4.26697	7.29609	4.88739	4.48201	4.78909	7.87576
26.0667	5.9763	4.26651	7.29477	4.88643	4.48097	4.78797	7.87403
26.0833	5.97407	4.26605	7.29346	4.88546	4.47992	4.78685	7.8723
26.1	5.97185	4.26559	7.29214	4.8845	4.47888	4.78573	7.87056
26.1167	5.96962	4.26513	7.29083	4.88354	4.47783	4.78462	7.86883
26.1333	5.9674	4.26467	7.28952	4.88258	4.47679	4.7835	7.8671
26.15	5.96517	4.26421	7.2882	4.88162	4.47574	4.78238	7.86537
26.1667	5.96295	4.26375	7.28689	4.88066	4.4747	4.78127	7.86364
26.1833	5.96073	4.26329	7.28558	4.8797	4.47366	4.78015	7.86191
26.2	5.9585	4.26283	7.28426	4.87874	4.47262	4.77903	7.86018
26.2167	5.95628	4.26237	7.28295	4.87778	4.47158	4.77792	7.85845
26.2333	5.95406	4.26191	7.28164	4.87682	4.47053	4.7768	7.85672
26.25	5.95183	4.26145	7.28033	4.87586	4.46949	4.77569	7.85499
26.2667	5.94961	4.26099	7.27902	4.8749	4.46845	4.77458	7.85326
26.2833	5.94739	4.26053	7.2777	4.87395	4.46741	4.77346	7.85153
26.3	5.94517	4.26007	7.27639	4.87299	4.46638	4.77235	7.8498
26.3167	5.94295	4.25961	7.27508	4.87203	4.46534	4.77123	7.84807
26.3333	5.94073	4.25915	7.27377	4.87107	4.4643	4.77012	7.84634
26.35	5.93851	4.25869	7.27246	4.87011	4.46326	4.76901	7.84461
26.3667	5.93629	4.25824	7.27115	4.86916	4.46223	4.7679	7.84288
26.3833	5.93407	4.25778	7.26985	4.8682	4.46119	4.76679	7.84115
26.4	5.93185	4.25732	7.26854	4.86725	4.46015	4.76567	7.83942
26.4167	5.92963	4.25686	7.26723	4.86629	4.45912	4.76456	7.83769
26.4333	5.92741	4.2564	7.26592	4.86533	4.45808	4.76345	7.83596
26.45	5.9252	4.25594	7.26461	4.86438	4.45705	4.76234	7.83423
26.4667	5.92298	4.25548	7.26331	4.86342	4.45601	4.76123	7.83249
26.4833	5.92076	4.25503	7.262	4.86247	4.45498	4.76012	7.83076
26.5	5.91854	4.25457	7.26069	4.86151	4.45395	4.75901	7.82903
26.5167	5.91633	4.25411	7.25939	4.86056	4.45291	4.7579	7.8273
26.5333	5.91411	4.25365	7.25808	4.8596	4.45188	4.75679	7.82557
26.55	5.91189	4.25319	7.25678	4.85865	4.45085	4.75569	7.82384
26.5667	5.90968	4.25274	7.25547	4.8577	4.44982	4.75458	7.82211
26.5833	5.90746	4.25228	7.25417	4.85674	4.44879	4.75347	7.82038
26.6	5.90525	4.25182	7.25286	4.85579	4.44776	4.75236	7.81865
26.6167	5.90303	4.25136	7.25156	4.85484	4.44673	4.75126	7.81692
26.6333	5.90082	4.25091	7.25025	4.85389	4.4457	4.75015	7.81519
26.65	5.89861	4.25045	7.24895	4.85293	4.44467	4.74904	7.81346
26.6667	5.89639	4.24999	7.24765	4.85198	4.44364	4.74794	7.81173
26.6833	5.89418	4.24953	7.24634	4.85103	4.44262	4.74683	7.81
26.7	5.89197	4.24908	7.24504	4.85008	4.44159	4.74573	7.80827
26.7167	5.88975	4.24862	7.24374	4.84913	4.44056	4.74462	7.80654
26.7333	5.88754	4.24816	7.24244	4.84818	4.43954	4.74352	7.80481
26.75	5.88533	4.24771	7.24113	4.84723	4.43851	4.74241	7.80308
26.7667	5.88312	4.24725	7.23983	4.84628	4.43748	4.74131	7.80135
26.7833	5.88091	4.24679	7.23853	4.84533	4.43646	4.74021	7.79962
26.8	5.8787	4.24634	7.23723	4.84438	4.43544	4.7391	7.79789
26.8167	5.87648	4.24588	7.23593	4.84343	4.43441	4.738	7.79616
26.8333	5.87427	4.24542	7.23463	4.84248	4.43339	4.7369	7.79442
26.85	5.87207	4.24497	7.23333	4.84153	4.43236	4.7358	7.79269
26.8667	5.86986	4.24451	7.23203	4.84058	4.43134	4.73469	7.79096
26.8833	5.86765	4.24406	7.23073	4.83963	4.43032	4.73359	7.78923
26.9	5.86544	4.2436	7.22943	4.83868	4.4293	4.73249	7.7875
26.9167	5.86323	4.24314	7.22814	4.83774	4.42828	4.73139	7.78577
26.9333	5.86102	4.24269	7.22684	4.83679	4.42726	4.73029	7.78404
26.95	5.85881	4.24223	7.22554	4.83584	4.42624	4.72919	7.78231
26.9667	5.85661	4.24178	7.22424	4.8349	4.42522	4.72809	7.78058
26.9833	5.8544	4.24132	7.22295	4.83395	4.4242	4.72699	7.77885
27	5.85219	4.24086	7.22165	4.833	4.42318	4.72589	7.77712
27.0167	5.84999	4.24041	7.22035	4.83206	4.42216	4.72479	7.77539
27.0333	5.84778	4.23995	7.21906	4.83111	4.42114	4.72369	7.77366
27.05	5.84557	4.2395	7.21776	4.83016	4.42013	4.7226	7.77193
27.0667	5.84337	4.23904	7.21647	4.82922	4.41911	4.7215	7.7702
27.0833	5.84116	4.23859	7.21517	4.82827	4.41809	4.7204	7.76847
27.1	5.83896	4.23813	7.21388	4.82733	4.41708	4.7193	7.76674
27.1167	5.83675	4.23768	7.21258	4.82638	4.41606	4.71821	7.76501
27.1333	5.83455	4.23722	7.21129	4.82544	4.41505	4.71711	7.76328
27.15	5.83235	4.23677	7.20999	4.8245	4.41403	4.71602	7.76155
27.1667	5.83014	4.23631	7.2087	4.82355	4.41302	4.71492	7.75982
27.1833	5.82794	4.23586	7.20741	4.82261	4.412	4.71382	7.75809
27.2	5.82574	4.2354	7.20612	4.82166	4.41099	4.71273	7.75635
27.2167	5.82354	4.23495	7.20482	4.82072	4.40998	4.71163	7.75462
27.2333	5.82133	4.23449	7.20353	4.81978	4.40896	4.71054	7.75289
27.25	5.81913	4.23404	7.20224	4.81884	4.40795	4.70944	7.75116
27.2667	5.81693	4.23358	7.20095	4.81789	4.40694	4.70835	7.74943
27.2833	5.81473	4.23313	7.19966	4.81695	4.40593	4.70726	7.7477
27.3	5.81253	4.23268	7.19837	4.81601	4.40492	4.70617	7.74597
27.3167	5.81033	4.23222	7.19707	4.81507	4.40391	4.70507	7.74424
27.3333	5.80813	4.23177	7.19578	4.81413	4.4029	4.70398	7.74251
27.35	5.80593	4.23131	7.19449	4.81319	4.40189	4.70289	7.74078
27.3667	5.80373	4.23086	7.1932	4.81224	4.40088	4.7018	7.73905
27.3833	5.80153	4.23041	7.19192	4.8113	4.39988	4.7007	7.73732
27.4	5.79933	4.22995	7.19063	4.81036	4.39887	4.69961	7.73559
27.4167	5.79713	4.2295	7.18934	4.80942	4.39786	4.69852	7.73386
27.4333	5.79494	4.22904	7.18805	4.80848	4.39685	4.69743	7.73213
27.45	5.79274	4.22859	7.18676	4.80754	4.39585	4.69634	7.7304
27.4667	5.79054	4.22814	7.18547	4.8066	4.39484	4.69525	7.72867
27.4833	5.78834	4.22768	7.18419	4.80567	4.39384	4.69416	7.72694
27.5	5.78615	4.22723	7.1829	4.80473	4.39283	4.69307	7.72521
27.5167	5.78395	4.22678	7.18161	4.80379	4.39183	4.69198	7.72348
27.5333	5.78175	4.22633	7.18032	4.80285	4.39082	4.6909	7.72175
27.55	5.77956	4.22587	7.17904	4.80191	4.38982	4.68981	7.72002
27.5667	5.77736	4.22542	7.17775	4.80097	4.38882	4.68872	7.71828
27.5833	5.77517	4.22497	7.17647	4.80004	4.38781	4.68763	7.71655
27.6	5.77297	4.22451	7.17518	4.7991	4.38681	4.68654	7.71482
27.6167	5.77078	4.22406	7.1739	4.79816	4.38581	4.68546	7.71309
27.6333	5.76859	4.22361	7.17261	4.79722	4.38481	4.68437	7.71136
27.65	5.76639	4.22315	7.17133	4.79629	4.38381	4.68328	7.70963
27.6667	5.7642	4.2227	7.17004	4.79535	4.38281	4.6822	7.7079
27.6833	5.76201	4.22225	7.16876	4.79442	4.38181	4.68111	7.70617
27.7	5.75981	4.2218	7.16748	4.79348	4.38081	4.68003	7.70444
27.7167	5.75762	4.22134	7.16619	4.79254	4.37981	4.67894	7.70271
27.7333	5.75543	4.22089	7.16491	4.79161	4.37881	4.67786	7.70098
27.75	5.75324	4.22044	7.16363	4.79067	4.37781	4.67677	7.69925
27.7667	5.75105	4.21999	7.16235	4.78974	4.37681	4.67569	7.69752
27.7833	5.74886	4.21954	7.16106	4.7888	4.37582	4.67461	7.69579
27.8	5.74667	4.21908	7.15978	4.78787	4.37482	4.67352	7.69406
27.8167	5.74448	4.21863	7.1585	4.78693	4.37382	4.67244	7.69233
27.8333	5.74229	4.21818	7.15722	4.786	4.37283	4.67136	7.6906
27.85	5.7401	4.21773	7.15594	4.78507	4.37183	4.67027	7.68887
27.8667	5.73791	4.21728	7.15466	4.78413	4.37084	4.66919	7.68714
27.8833	5.73572	4.21683	7.15338	4.7832	4.36984	4.66811	7.68541
27.9	5.73353	4.21637	7.1521	4.78227	4.36885	4.66703	7.68368
27.9167	5.73134	4.21592	7.15082	4.78133	4.36785	4.66595	7.68195
27.9333	5.72915	4.21547	7.14954	4.7804	4.36686	4.66487	7.68021
27.95	5.72696	4.21502	7.14826	4.77947	4.36587	4.66379	7.67848
27.9667	5.72478	4.21457	7.14698	4.77854	4.36487	4.66271	7.67675
27.9833	5.72259	4.21412	7.1457	4.7776	4.36388	4.66162	7.67502
28	5.7204	4.21367	7.14443	4.77667	4.36289	4.66055	7.67329
28.0167	5.71822	4.21322	7.14315	4.77574	4.3619	4.65947	7.67156
28.0333	5.71603	4.21277	7.14187	4.77481	4.36091	4.65839	7.66983
28.05	5.71385	4.21231	7.14059	4.77388	4.35992	4.65731	7.6681
28.0667	5.71166	4.21186	7.13932	4.77295	4.35893	4.65623	7.66637
28.0833	5.70948	4.21141	7.13804	4.77202	4.35794	4.65515	7.66464
28.1	5.70729	4.21096	7.13676	4.77109	4.35695	4.65407	7.66291
28.1167	5.70511	4.21051	7.13549	4.77016	4.35596	4.653	7.66118
28.1333	5.70292	4.21006	7.13421	4.76923	4.35497	4.65192	7.65945
28.15	5.70074	4.20961	7.13294	4.7683	4.35398	4.65084	7.65772
28.1667	5.69856	4.20916	7.13166	4.76737	4.353	4.64977	7.65599
28.1833	5.69637	4.20871	7.13039	4.76644	4.35201	4.64869	7.65426
28.2	5.69419	4.20826	7.12911	4.76551	4.35102	4.64761	7.65253
28.2167	5.69201	4.20781	7.12784	4.76458	4.35004	4.64654	7.6508
28.2333	5.68983	4.20736	7.12657	4.76365	4.34905	4.64546	7.64907
28.25	5.68764	4.20691	7.12529	4.76272	4.34807	4.64439	7.64734
28.2667	5.68546	4.20646	7.12402	4.7618	4.34708	4.64331	7.64561
28.2833	5.68328	4.20601	7.12275	4.76087	4.3461	4.64224	7.64387
28.3	5.6811	4.20556	7.12147	4.75994	4.34511	4.64116	7.64214
28.3167	5.67892	4.20511	7.1202	4.75901	4.34413	4.64009	7.64041
28.3333	5.67674	4.20466	7.11893	4.75808	4.34315	4.63902	7.63868
28.35	5.67456	4.20421	7.11766	4.75716	4.34216	4.63794	7.63695
28.3667	5.67238	4.20376	7.11639	4.75623	4.34118	4.63687	7.63522
28.3833	5.6702	4.20331	7.11511	4.7553	4.3402	4.6358	7.63349
28.4	5.66802	4.20286	7.11384	4.75438	4.33922	4.63473	7.63176
28.4167	5.66584	4.20241	7.11257	4.75345	4.33824	4.63365	7.63003
28.4333	5.66367	4.20196	7.1113	4.75253	4.33726	4.63258	7.6283
28.45	5.66149	4.20152	7.11003	4.7516	4.33628	4.63151	7.62657
28.4667	5.65931	4.20107	7.10876	4.75068	4.3353	4.63044	7.62484
28.4833	5.65713	4.20062	7.10749	4.74975	4.33432	4.62937	7.62311
28.5	5.65496	4.20017	7.10622	4.74883	4.33334	4.6283	7.62138
28.5167	5.65278	4.19972	7.10496	4.7479	4.33236	4.62723	7.61965
28.5333	5.6506	4.19927	7.10369	4.74698	4.33138	4.62616	7.61792
28.55	5.64843	4.19882	7.10242	4.74605	4.3304	4.62509	7.61619
28.5667	5.64625	4.19837	7.10115	4.74513	4.32943	4.62402	7.61446
28.5833	5.64408	4.19793	7.09988	4.7442	4.32845	4.62295	7.61273
28.6	5.6419	4.19748	7.09862	4.74328	4.32747	4.62188	7.611
28.6167	5.63973	4.19703	7.09735	4.74236	4.3265	4.62081	7.60927
28.6333	5.63755	4.19658	7.09608	4.74143	4.32552	4.61975	7.60754
28.65	5.63538	4.19613	7.09482	4.74051	4.32455	4.61868	7.6058
28.6667	5.63321	4.19568	7.09355	4.73959	4.32357	4.61761	7.60407
28.6833	5.63103	4.19524	7.09228	4.73866	4.3226	4.61654	7.60234
28.7	5.62886	4.19479	7.09102	4.73774	4.32162	4.61548	7.60061
28.7167	5.62669	4.19434	7.08975	4.73682	4.32065	4.61441	7.59888
28.7333	5.62452	4.19389	7.08849	4.7359	4.31968	4.61334	7.59715
28.75	5.62234	4.19344	7.08722	4.73497	4.3187	4.61228	7.59542
28.7667	5.62017	4.193	7.08596	4.73405	4.31773	4.61121	7.59369
28.7833	5.618	4.19255	7.08469	4.73313	4.31676	4.61015	7.59196
28.8	5.61583	4.1921	7.08343	4.73221	4.31579	4.60908	7.59023
28.8167	5.61366	4.19165	7.08217	4.73129	4.31482	4.60802	7.5885
28.8333	5.61149	4.19121	7.0809	4.73037	4.31385	4.60695	7.58677
28.85	5.60932	4.19076	7.07964	4.72945	4.31288	4.60589	7.58504
28.8667	5.60715	4.19031	7.07838	4.72853	4.31191	4.60482	7.58331
28.8833	5.60498	4.18986	7.07711	4.72761	4.31094	4.60376	7.58158
28.9	5.60281	4.18942	7.07585	4.72669	4.30997	4.6027	7.57985
28.9167	5.60064	4.18897	7.07459	4.72577	4.309	4.60163	7.57812
28.9333	5.59847	4.18852	7.07333	4.72485	4.30803	4.60057	7.57639
28.95	5.59631	4.18808	7.07207	4.72393	4.30706	4.59951	7.57466
28.9667	5.59414	4.18763	7.0708	4.72301	4.3061	4.59845	7.57293
28.9833	5.59197	4.18718	7.06954	4.72209	4.30513	4.59739	7.5712
29	5.5898	4.18674	7.06828	4.72117	4.30416	4.59632	7.56947
29.0167	5.58764	4.18629	7.06702	4.72025	4.3032	4.59526	7.56773
29.0333	5.58547	4.18584	7.06576	4.71933	4.30223	4.5942	7.566
29.05	5.58331	4.1854	7.0645	4.71842	4.30126	4.59314	7.56427
29.0667	5.58114	4.18495	7.06324	4.7175	4.3003	4.59208	7.56254
29.0833	5.57897	4.1845	7.06198	4.71658	4.29934	4.59102	7.56081
29.1	5.57681	4.18406	7.06073	4.71566	4.29837	4.58996	7.55908
29.1167	5.57464	4.18361	7.05947	4.71475	4.29741	4.5889	7.55735
29.1333	5.57248	4.18316	7.05821	4.71383	4.29644	4.58784	7.55562
29.15	5.57031	4.18272	7.05695	4.71291	4.29548	4.58678	7.55389
29.1667	5.56815	4.18227	7.05569	4.712	4.29452	4.58572	7.55216
29.1833	5.56599	4.18182	7.05444	4.71108	4.29356	4.58467	7.55043
29.2	5.56382	4.18138	7.05318	4.71016	4.29259	4.58361	7.5487
29.2167	5.56166	4.18093	7.05192	4.70925	4.29163	4.58255	7.54697
29.2333	5.5595	4.18049	7.05066	4.70833	4.29067	4.58149	7.54524
29.25	5.55734	4.18004	7.04941	4.70741	4.28971	4.58044	7.54351
29.2667	5.55517	4.1796	7.04815	4.7065	4.28875	4.57938	7.54178
29.2833	5.55301	4.17915	7.04689	4.70558	4.28779	4.57832	7.54005
29.3	5.55085	4.1787	7.04564	4.70467	4.28683	4.57727	7.53832
29.3167	5.54869	4.17826	7.04438	4.70375	4.28587	4.57621	7.53659
29.3333	5.54653	4.17781	7.04313	4.70284	4.28491	4.57515	7.53486
29.35	5.54437	4.17737	7.04187	4.70192	4.28396	4.5741	7.53313
29.3667	5.54221	4.17692	7.04062	4.70101	4.283	4.57304	7.5314
29.3833	5.54005	4.17648	7.03937	4.70009	4.28204	4.57199	7.52966
29.4	5.53789	4.17603	7.03811	4.69918	4.28108	4.57093	7.52793
29.4167	5.53573	4.17559	7.03686	4.69827	4.28013	4.56988	7.5262
29.4333	5.53357	4.17514	7.0356	4.69735	4.27917	4.56883	7.52447
29.45	5.53141	4.1747	7.03435	4.69644	4.27821	4.56777	7.52274
29.4667	5.52926	4.17425	7.0331	4.69553	4.27726	4.56672	7.52101
29.4833	5.5271	4.17381	7.03185	4.69461	4.2763	4.56567	7.51928
29.5	5.52494	4.17336	7.03059	4.6937	4.27535	4.56461	7.51755
29.5167	5.52278	4.17292	7.02934	4.69279	4.27439	4.56356	7.51582
29.5333	5.52063	4.17247	7.02809	4.69188	4.27344	4.56251	7.51409
29.55	5.51847	4.17203	7.02684	4.69096	4.27249	4.56146	7.51236
29.5667	5.51631	4.17158	7.02559	4.69005	4.27153	4.5604	7.51063
29.5833	5.51416	4.17114	7.02434	4.68914	4.27058	4.55935	7.5089
29.6	5.512	4.17069	7.02308	4.68823	4.26963	4.5583	7.50717
29.6167	5.50985	4.17025	7.02183	4.68732	4.26868	4.55725	7.50544
29.6333	5.50769	4.16981	7.02058	4.6864	4.26773	4.5562	7.50371
29.65	5.50554	4.16936	7.01933	4.68549	4.26677	4.55515	7.50198
29.6667	5.50338	4.16892	7.01808	4.68458	4.26582	4.5541	7.50025
29.6833	5.50123	4.16847	7.01683	4.68367	4.26487	4.55305	7.49852
29.7	5.49907	4.16803	7.01559	4.68276	4.26392	4.552	7.49679
29.7167	5.49692	4.16758	7.01434	4.68185	4.26297	4.55095	7.49506
29.7333	5.49477	4.16714	7.01309	4.68094	4.26202	4.5499	7.49333
29.75	5.49262	4.1667	7.01184	4.68003	4.26107	4.54885	7.49159
29.7667	5.49046	4.16625	7.01059	4.67912	4.26013	4.5478	7.48986
29.7833	5.48831	4.16581	7.00934	4.67821	4.25918	4.54675	7.48813
29.8	5.48616	4.16537	7.0081	4.6773	4.25823	4.54571	7.4864
29.8167	5.48401	4.16492	7.00685	4.67639	4.25728	4.54466	7.48467
29.8333	5.48186	4.16448	7.0056	4.67548	4.25634	4.54361	7.48294
29.85	5.47971	4.16404	7.00436	4.67457	4.25539	4.54257	7.48121
29.8667	5.47756	4.16359	7.00311	4.67366	4.25444	4.54152	7.47948
29.8833	5.47541	4.16315	7.00186	4.67276	4.2535	4.54047	7.47775
29.9	5.47326	4.16271	7.00062	4.67185	4.25255	4.53943	7.47602
29.9167	5.47111	4.16226	6.99937	4.67094	4.25161	4.53838	7.47429
29.9333	5.46896	4.16182	6.99812	4.67003	4.25066	4.53733	7.47256
29.95	5.46681	4.16138	6.99688	4.66912	4.24972	4.53629	7.47083
29.9667	5.46466	4.16093	6.99564	4.66821	4.24877	4.53524	7.4691
29.9833	5.46251	4.16049	6.99439	4.66731	4.24783	4.5342	7.46737
30	5.46036	4.16005	6.99315	4.6664	4.24689	4.53315	7.46564
30.0167	5.45821	4.1596	6.9919	4.66549	4.24594	4.53211	7.46391
30.0333	5.45607	4.15916	6.99066	4.66459	4.245	4.53107	7.46218
30.05	5.45392	4.15872	6.98941	4.66368	4.24406	4.53002	7.46045
30.0667	5.45177	4.15828	6.98817	4.66277	4.24312	4.52898	7.45872
30.0833	5.44963	4.15783	6.98693	4.66187	4.24218	4.52794	7.45699
30.1	5.44748	4.15739	6.98568	4.66096	4.24123	4.52689	7.45526
30.1167	5.44533	4.15695	6.98444	4.66005	4.24029	4.52585	7.45352
30.1333	5.44319	4.15651	6.9832	4.65915	4.23935	4.52481	7.45179
30.15	5.44104	4.15606	6.98196	4.65824	4.23841	4.52377	7.45006
30.1667	5.4389	4.15562	6.98072	4.65734	4.23747	4.52272	7.44833
30.1833	5.43675	4.15518	6.97947	4.65643	4.23653	4.52168	7.4466
30.2	5.43461	4.15474	6.97823	4.65553	4.2356	4.52064	7.44487
30.2167	5.43246	4.1543	6.97699	4.65462	4.23466	4.5196	7.44314
30.2333	5.43032	4.15385	6.97575	4.65372	4.23372	4.51856	7.44141
30.25	5.42818	4.15341	6.97451	4.65281	4.23278	4.51752	7.43968
30.2667	5.42603	4.15297	6.97327	4.65191	4.23184	4.51648	7.43795
30.2833	5.42389	4.15253	6.97203	4.651	4.23091	4.51544	7.43622
30.3	5.42175	4.15209	6.97079	4.6501	4.22997	4.5144	7.43449
30.3167	5.41961	4.15165	6.96955	4.64919	4.22903	4.51336	7.43276
30.3333	5.41747	4.1512	6.96831	4.64829	4.2281	4.51232	7.43103
30.35	5.41533	4.15076	6.96707	4.64739	4.22716	4.51128	7.4293
30.3667	5.41318	4.15032	6.96583	4.64648	4.22623	4.51024	7.42757
30.3833	5.41104	4.14988	6.9646	4.64558	4.22529	4.5092	7.42584
30.4	5.4089	4.14944	6.96336	4.64467	4.22436	4.50817	7.42411
30.4167	5.40676	4.149	6.96212	4.64377	4.22343	4.50713	7.42238
30.4333	5.40462	4.14855	6.96088	4.64287	4.22249	4.50609	7.42065
30.45	5.40248	4.14811	6.95964	4.64197	4.22156	4.50505	7.41892
30.4667	5.40034	4.14767	6.95841	4.64106	4.22063	4.50402	7.41719
30.4833	5.3982	4.14723	6.95717	4.64016	4.21969	4.50298	7.41545
30.5	5.39607	4.14679	6.95593	4.63926	4.21876	4.50194	7.41372
30.5167	5.39393	4.14635	6.9547	4.63836	4.21783	4.50091	7.41199
30.5333	5.39179	4.14591	6.95346	4.63746	4.2169	4.49987	7.41026
30.55	5.38965	4.14547	6.95222	4.63655	4.21597	4.49883	7.40853
30.5667	5.38751	4.14503	6.95099	4.63565	4.21504	4.4978	7.4068
30.5833	5.38538	4.14459	6.94975	4.63475	4.21411	4.49676	7.40507
30.6	5.38324	4.14415	6.94852	4.63385	4.21318	4.49573	7.40334
30.6167	5.3811	4.1437	6.94728	4.63295	4.21225	4.49469	7.40161
30.6333	5.37897	4.14326	6.94605	4.63205	4.21132	4.49366	7.39988
30.65	5.37683	4.14282	6.94481	4.63115	4.21039	4.49263	7.39815
30.6667	5.37469	4.14238	6.94358	4.63025	4.20946	4.49159	7.39642
30.6833	5.37256	4.14194	6.94235	4.62935	4.20853	4.49056	7.39469
30.7	5.37042	4.1415	6.94111	4.62845	4.2076	4.48952	7.39296
30.7167	5.36829	4.14106	6.93988	4.62755	4.20668	4.48849	7.39123
30.7333	5.36616	4.14062	6.93865	4.62665	4.20575	4.48746	7.3895
30.75	5.36402	4.14018	6.93741	4.62575	4.20482	4.48643	7.38777
30.7667	5.36189	4.13974	6.93618	4.62485	4.2039	4.48539	7.38604
30.7833	5.35975	4.1393	6.93495	4.62395	4.20297	4.48436	7.38431
30.8	5.35762	4.13886	6.93371	4.62305	4.20204	4.48333	7.38258
30.8167	5.35549	4.13842	6.93248	4.62215	4.20112	4.4823	7.38085
30.8333	5.35335	4.13798	6.93125	4.62125	4.20019	4.48127	7.37912
30.85	5.35122	4.13754	6.93002	4.62035	4.19927	4.48024	7.37738
30.8667	5.34909	4.1371	6.92879	4.61945	4.19834	4.47921	7.37565
30.8833	5.34696	4.13666	6.92756	4.61855	4.19742	4.47818	7.37392
30.9	5.34483	4.13622	6.92633	4.61766	4.1965	4.47715	7.37219
30.9167	5.3427	4.13578	6.9251	4.61676	4.19557	4.47612	7.37046
30.9333	5.34057	4.13534	6.92387	4.61586	4.19465	4.47509	7.36873
30.95	5.33844	4.13491	6.92264	4.61496	4.19373	4.47406	7.367
30.9667	5.33631	4.13447	6.92141	4.61406	4.19281	4.47303	7.36527
30.9833	5.33418	4.13403	6.92018	4.61317	4.19188	4.472	7.36354
31	5.33205	4.13359	6.91895	4.61227	4.19096	4.47097	7.36181
31.0167	5.32992	4.13315	6.91772	4.61137	4.19004	4.46994	7.36008
31.0333	5.32779	4.13271	6.91649	4.61048	4.18912	4.46891	7.35835
31.05	5.32566	4.13227	6.91526	4.60958	4.1882	4.46788	7.35662
31.0667	5.32353	4.13183	6.91403	4.60868	4.18728	4.46686	7.35489
31.0833	5.3214	4.13139	6.9128	4.60779	4.18636	4.46583	7.35316
31.1	5.31928	4.13095	6.91158	4.60689	4.18544	4.4648	7.35143
31.1167	5.31715	4.13051	6.91035	4.60599	4.18452	4.46378	7.3497
31.1333	5.31502	4.13008	6.90912	4.6051	4.1836	4.46275	7.34797
31.15	5.31289	4.12964	6.90789	4.6042	4.18269	4.46172	7.34624
31.1667	5.31077	4.1292	6.90667	4.6033	4.18177	4.4607	7.34451
31.1833	5.30864	4.12876	6.90544	4.60241	4.18085	4.45967	7.34278
31.2	5.30652	4.12832	6.90421	4.60151	4.17993	4.45865	7.34105
31.2167	5.30439	4.12788	6.90299	4.60062	4.17902	4.45762	7.33931
31.2333	5.30227	4.12744	6.90176	4.59972	4.1781	4.45659	7.33758
31.25	5.30014	4.12701	6.90054	4.59883	4.17718	4.45557	7.33585
31.2667	5.29802	4.12657	6.89931	4.59793	4.17627	4.45455	7.33412
31.2833	5.29589	4.12613	6.89809	4.59704	4.17535	4.45352	7.33239
31.3	5.29377	4.12569	6.89686	4.59614	4.17444	4.4525	7.33066
31.3167	5.29164	4.12525	6.89564	4.59525	4.17352	4.45147	7.32893
31.3333	5.28952	4.12481	6.89441	4.59435	4.17261	4.45045	7.3272
31.35	5.2874	4.12438	6.89319	4.59346	4.17169	4.44943	7.32547
31.3667	5.28527	4.12394	6.89196	4.59257	4.17078	4.4484	7.32374
31.3833	5.28315	4.1235	6.89074	4.59167	4.16986	4.44738	7.32201
31.4	5.28103	4.12306	6.88952	4.59078	4.16895	4.44636	7.32028
31.4167	5.27891	4.12263	6.88829	4.58989	4.16804	4.44534	7.31855
31.4333	5.27678	4.12219	6.88707	4.58899	4.16713	4.44431	7.31682
31.45	5.27466	4.12175	6.88585	4.5881	4.16621	4.44329	7.31509
31.4667	5.27254	4.12131	6.88462	4.58721	4.1653	4.44227	7.31336
31.4833	5.27042	4.12088	6.8834	4.58631	4.16439	4.44125	7.31163
31.5	5.2683	4.12044	6.88218	4.58542	4.16348	4.44023	7.3099
31.5167	5.26618	4.12	6.88096	4.58453	4.16257	4.43921	7.30817
31.5333	5.26406	4.11956	6.87974	4.58364	4.16166	4.43819	7.30644
31.55	5.26194	4.11913	6.87851	4.58274	4.16075	4.43716	7.30471
31.5667	5.25982	4.11869	6.87729	4.58185	4.15984	4.43615	7.30298
31.5833	5.2577	4.11825	6.87607	4.58096	4.15893	4.43513	7.30124
31.6	5.25558	4.11781	6.87485	4.58007	4.15802	4.43411	7.29951
31.6167	5.25347	4.11738	6.87363	4.57917	4.15711	4.43309	7.29778
31.6333	5.25135	4.11694	6.87241	4.57828	4.1562	4.43207	7.29605
31.65	5.24923	4.1165	6.87119	4.57739	4.15529	4.43105	7.29432
31.6667	5.24711	4.11607	6.86997	4.5765	4.15439	4.43003	7.29259
31.6833	5.245	4.11563	6.86875	4.57561	4.15348	4.42901	7.29086
31.7	5.24288	4.11519	6.86753	4.57472	4.15257	4.42799	7.28913
31.7167	5.24076	4.11475	6.86631	4.57383	4.15167	4.42698	7.2874
31.7333	5.23865	4.11432	6.86509	4.57294	4.15076	4.42596	7.28567
31.75	5.23653	4.11388	6.86388	4.57205	4.14985	4.42494	7.28394
31.7667	5.23442	4.11345	6.86266	4.57116	4.14895	4.42392	7.28221
31.7833	5.2323	4.11301	6.86144	4.57027	4.14804	4.42291	7.28048
31.8	5.23019	4.11257	6.86022	4.56937	4.14714	4.42189	7.27875
31.8167	5.22807	4.11214	6.859	4.56849	4.14623	4.42087	7.27702
31.8333	5.22596	4.1117	6.85779	4.5676	4.14533	4.41986	7.27529
31.85	5.22384	4.11126	6.85657	4.56671	4.14442	4.41884	7.27356
31.8667	5.22173	4.11083	6.85535	4.56582	4.14352	4.41782	7.27183
31.8833	5.21961	4.11039	6.85414	4.56493	4.14262	4.41681	7.2701
31.9	5.2175	4.10995	6.85292	4.56404	4.14171	4.41579	7.26837
31.9167	5.21539	4.10952	6.8517	4.56315	4.14081	4.41478	7.26664
31.9333	5.21328	4.10908	6.85049	4.56226	4.13991	4.41376	7.2649
31.95	5.21116	4.10865	6.84927	4.56137	4.13901	4.41275	7.26317
31.9667	5.20905	4.10821	6.84806	4.56048	4.1381	4.41174	7.26144
31.9833	5.20694	4.10777	6.84684	4.55959	4.1372	4.41072	7.25971
32	5.20483	4.10734	6.84563	4.5587	4.1363	4.40971	7.25798
32.0167	5.20272	4.1069	6.84441	4.55782	4.1354	4.4087	7.25625
32.0333	5.20061	4.10647	6.8432	4.55693	4.1345	4.40768	7.25452
32.05	5.1985	4.10603	6.84198	4.55604	4.1336	4.40667	7.25279
32.0667	5.19639	4.1056	6.84077	4.55515	4.1327	4.40566	7.25106
32.0833	5.19428	4.10516	6.83955	4.55426	4.1318	4.40464	7.24933
32.1	5.19217	4.10472	6.83834	4.55338	4.1309	4.40363	7.2476
32.1167	5.19006	4.10429	6.83713	4.55249	4.13	4.40262	7.24587
32.1333	5.18795	4.10385	6.83591	4.5516	4.1291	4.40161	7.24414
32.15	5.18584	4.10342	6.8347	4.55071	4.12821	4.4006	7.24241
32.1667	5.18373	4.10298	6.83349	4.54983	4.12731	4.39958	7.24068
32.1833	5.18162	4.10255	6.83227	4.54894	4.12641	4.39857	7.23895
32.2	5.17951	4.10211	6.83106	4.54805	4.12551	4.39756	7.23722
32.2167	5.17741	4.10168	6.82985	4.54717	4.12462	4.39655	7.23549
32.2333	5.1753	4.10124	6.82864	4.54628	4.12372	4.39554	7.23376
32.25	5.17319	4.10081	6.82743	4.54539	4.12282	4.39453	7.23203
32.2667	5.17109	4.10037	6.82621	4.54451	4.12193	4.39352	7.2303
32.2833	5.16898	4.09994	6.825	4.54362	4.12103	4.39251	7.22857
32.3	5.16687	4.0995	6.82379	4.54273	4.12014	4.3915	7.22683
32.3167	5.16477	4.09907	6.82258	4.54185	4.11924	4.39049	7.2251
32.3333	5.16266	4.09863	6.82137	4.54096	4.11835	4.38948	7.22337
32.35	5.16056	4.0982	6.82016	4.54008	4.11745	4.38848	7.22164
32.3667	5.15845	4.09776	6.81895	4.53919	4.11656	4.38747	7.21991
32.3833	5.15635	4.09733	6.81774	4.53831	4.11567	4.38646	7.21818
32.4	5.15424	4.09689	6.81653	4.53742	4.11477	4.38545	7.21645
32.4167	5.15214	4.09646	6.81532	4.53654	4.11388	4.38444	7.21472
32.4333	5.15003	4.09603	6.81411	4.53565	4.11299	4.38344	7.21299
32.45	5.14793	4.09559	6.8129	4.53477	4.1121	4.38243	7.21126
32.4667	5.14583	4.09516	6.81169	4.53388	4.1112	4.38142	7.20953
32.4833	5.14373	4.09472	6.81049	4.533	4.11031	4.38041	7.2078
32.5	5.14162	4.09429	6.80928	4.53211	4.10942	4.37941	7.20607
32.5167	5.13952	4.09385	6.80807	4.53123	4.10853	4.3784	7.20434
32.5333	5.13742	4.09342	6.80686	4.53034	4.10764	4.37739	7.20261
32.55	5.13532	4.09299	6.80565	4.52946	4.10675	4.37639	7.20088
32.5667	5.13322	4.09255	6.80445	4.52857	4.10586	4.37538	7.19915
32.5833	5.13111	4.09212	6.80324	4.52769	4.10497	4.37438	7.19742
32.6	5.12901	4.09168	6.80203	4.52681	4.10408	4.37337	7.19569
32.6167	5.12691	4.09125	6.80082	4.52592	4.10319	4.37237	7.19396
32.6333	5.12481	4.09082	6.79962	4.52504	4.1023	4.37136	7.19223
32.65	5.12271	4.09038	6.79841	4.52416	4.10141	4.37036	7.1905
32.6667	5.12061	4.08995	6.7972	4.52327	4.10052	4.36935	7.18876
32.6833	5.11851	4.08952	6.796	4.52239	4.09964	4.36835	7.18703
32.7	5.11641	4.08908	6.79479	4.52151	4.09875	4.36735	7.1853
32.7167	5.11432	4.08865	6.79359	4.52063	4.09786	4.36634	7.18357
32.7333	5.11222	4.08821	6.79238	4.51974	4.09697	4.36534	7.18184
32.75	5.11012	4.08778	6.79118	4.51886	4.09609	4.36434	7.18011
32.7667	5.10802	4.08735	6.78997	4.51798	4.0952	4.36333	7.17838
32.7833	5.10592	4.08692	6.78877	4.5171	4.09431	4.36233	7.17665
32.8	5.10383	4.08648	6.78756	4.51621	4.09343	4.36133	7.17492
32.8167	5.10173	4.08605	6.78636	4.51533	4.09254	4.36033	7.17319
32.8333	5.09963	4.08561	6.78516	4.51445	4.09166	4.35932	7.17146
32.85	5.09754	4.08518	6.78395	4.51357	4.09077	4.35832	7.16973
32.8667	5.09544	4.08475	6.78275	4.51269	4.08989	4.35732	7.168
32.8833	5.09334	4.08432	6.78154	4.5118	4.08901	4.35632	7.16627
32.9	5.09125	4.08388	6.78034	4.51092	4.08812	4.35532	7.16454
32.9167	5.08915	4.08345	6.77914	4.51004	4.08724	4.35432	7.16281
32.9333	5.08706	4.08302	6.77794	4.50916	4.08635	4.35332	7.16108
32.95	5.08496	4.08258	6.77673	4.50828	4.08547	4.35232	7.15935
32.9667	5.08287	4.08215	6.77553	4.5074	4.08459	4.35132	7.15762
32.9833	5.08078	4.08172	6.77433	4.50652	4.08371	4.35032	7.15589
33	5.07868	4.08129	6.77313	4.50564	4.08282	4.34932	7.15416
33.0167	5.07659	4.08085	6.77192	4.50476	4.08194	4.34832	7.15243
33.0333	5.0745	4.08042	6.77072	4.50388	4.08106	4.34732	7.15069
33.05	5.0724	4.07999	6.76952	4.503	4.08018	4.34632	7.14896
33.0667	5.07031	4.07956	6.76832	4.50211	4.0793	4.34532	7.14723
33.0833	5.06822	4.07912	6.76712	4.50123	4.07842	4.34432	7.1455
33.1	5.06613	4.07869	6.76592	4.50035	4.07754	4.34332	7.14377
33.1167	5.06403	4.07826	6.76472	4.49947	4.07666	4.34233	7.14204
33.1333	5.06194	4.07783	6.76352	4.49859	4.07578	4.34133	7.14031
33.15	5.05985	4.07739	6.76232	4.49771	4.0749	4.34033	7.13858
33.1667	5.05776	4.07696	6.76112	4.49684	4.07402	4.33933	7.13685
33.1833	5.05567	4.07653	6.75992	4.49596	4.07314	4.33833	7.13512
33.2	5.05358	4.0761	6.75872	4.49508	4.07226	4.33734	7.13339
33.2167	5.05149	4.07567	6.75752	4.4942	4.07139	4.33634	7.13166
33.2333	5.0494	4.07523	6.75632	4.49332	4.07051	4.33534	7.12993
33.25	5.04731	4.0748	6.75512	4.49244	4.06963	4.33435	7.1282
[truncated: 3,359 more rows]
